# Supplementary material
Source: PubMed Central journal article supplement (PMC3271935)

**Phosphate Tether-Mediated  
Approach to the Formal Total Synthesis of  
(-)-Salicylihalamides A and B**

Rambabu Chegondi, Mary M. L. Tan and Paul R Hanson\*

*Department of Chemistry, University of Kansas, 1251 Wescoe Hall Drive, Lawrence, KS 66045-  
7582*

[phanson@ku.edu](mailto:phanson@ku.edu)

<sup>1</sup>H NMR, <sup>13</sup>C NMR spectra:

S-2 to S-30

CRB-1-251  
PROTON CDCl3 /apl/topspin rchegondi: 55

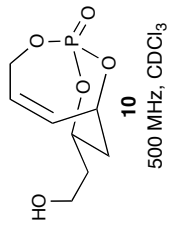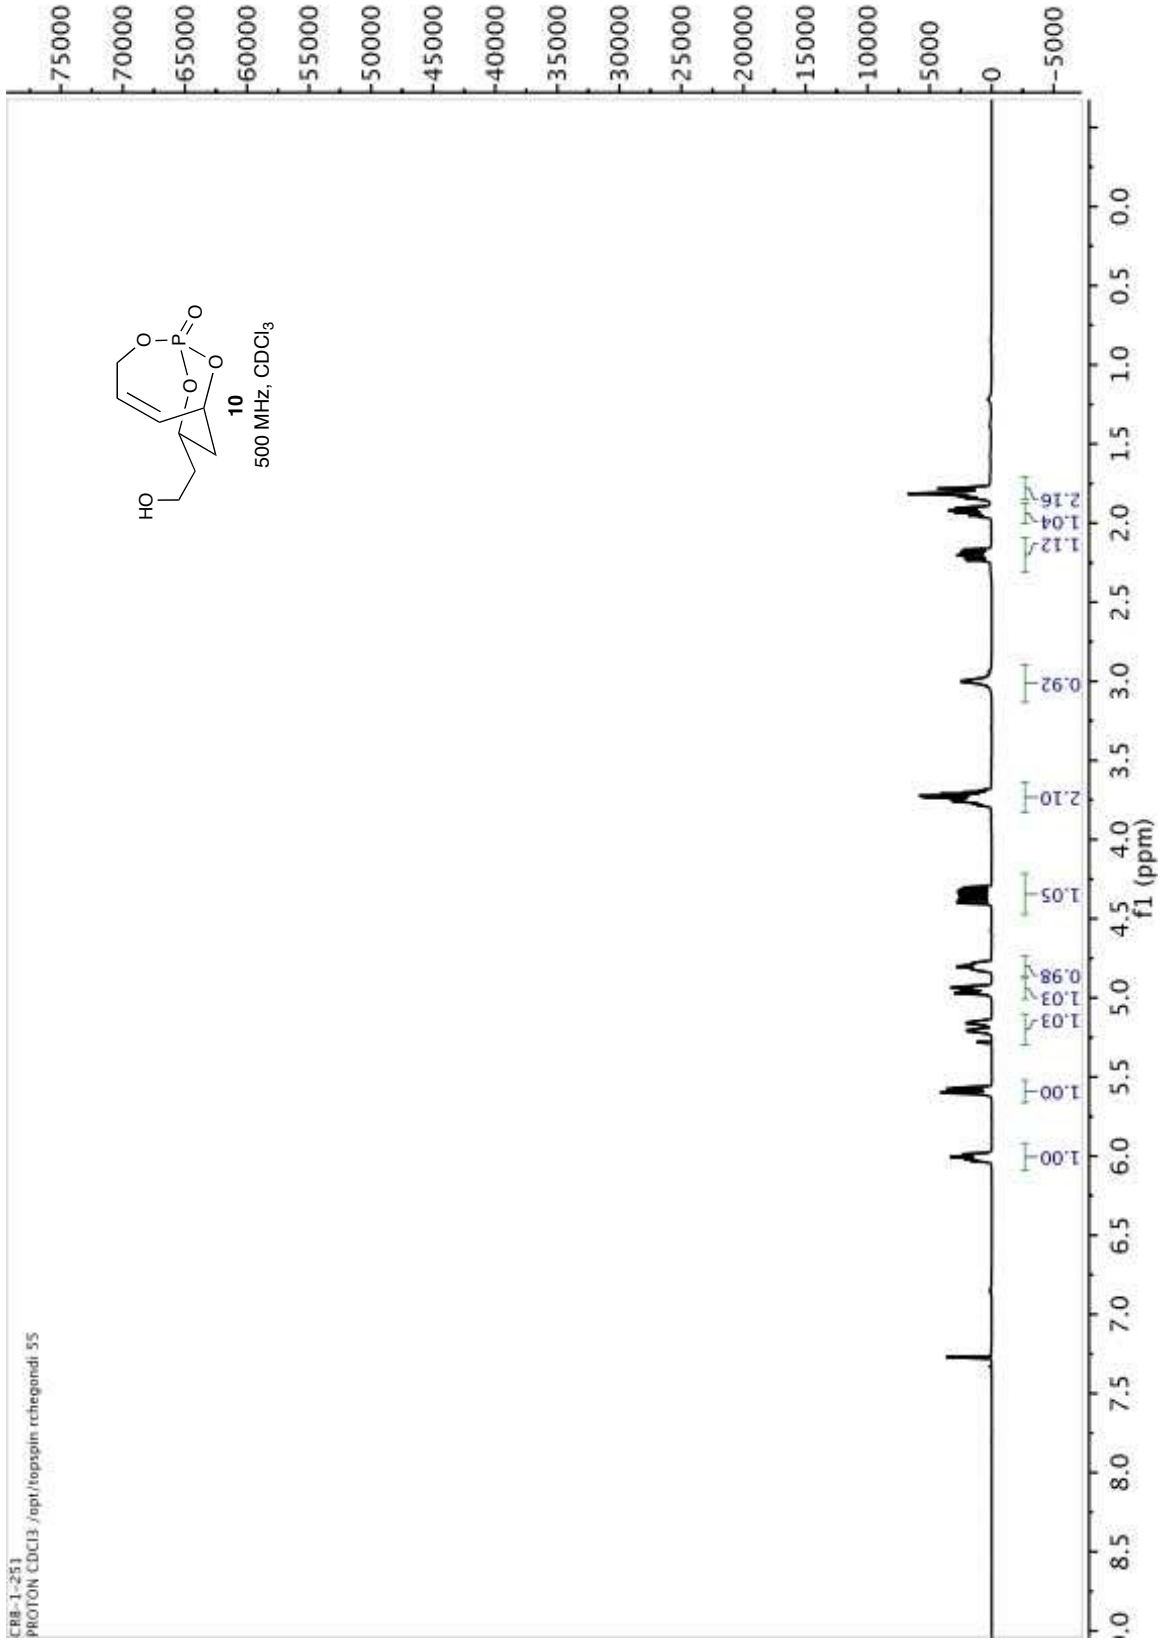

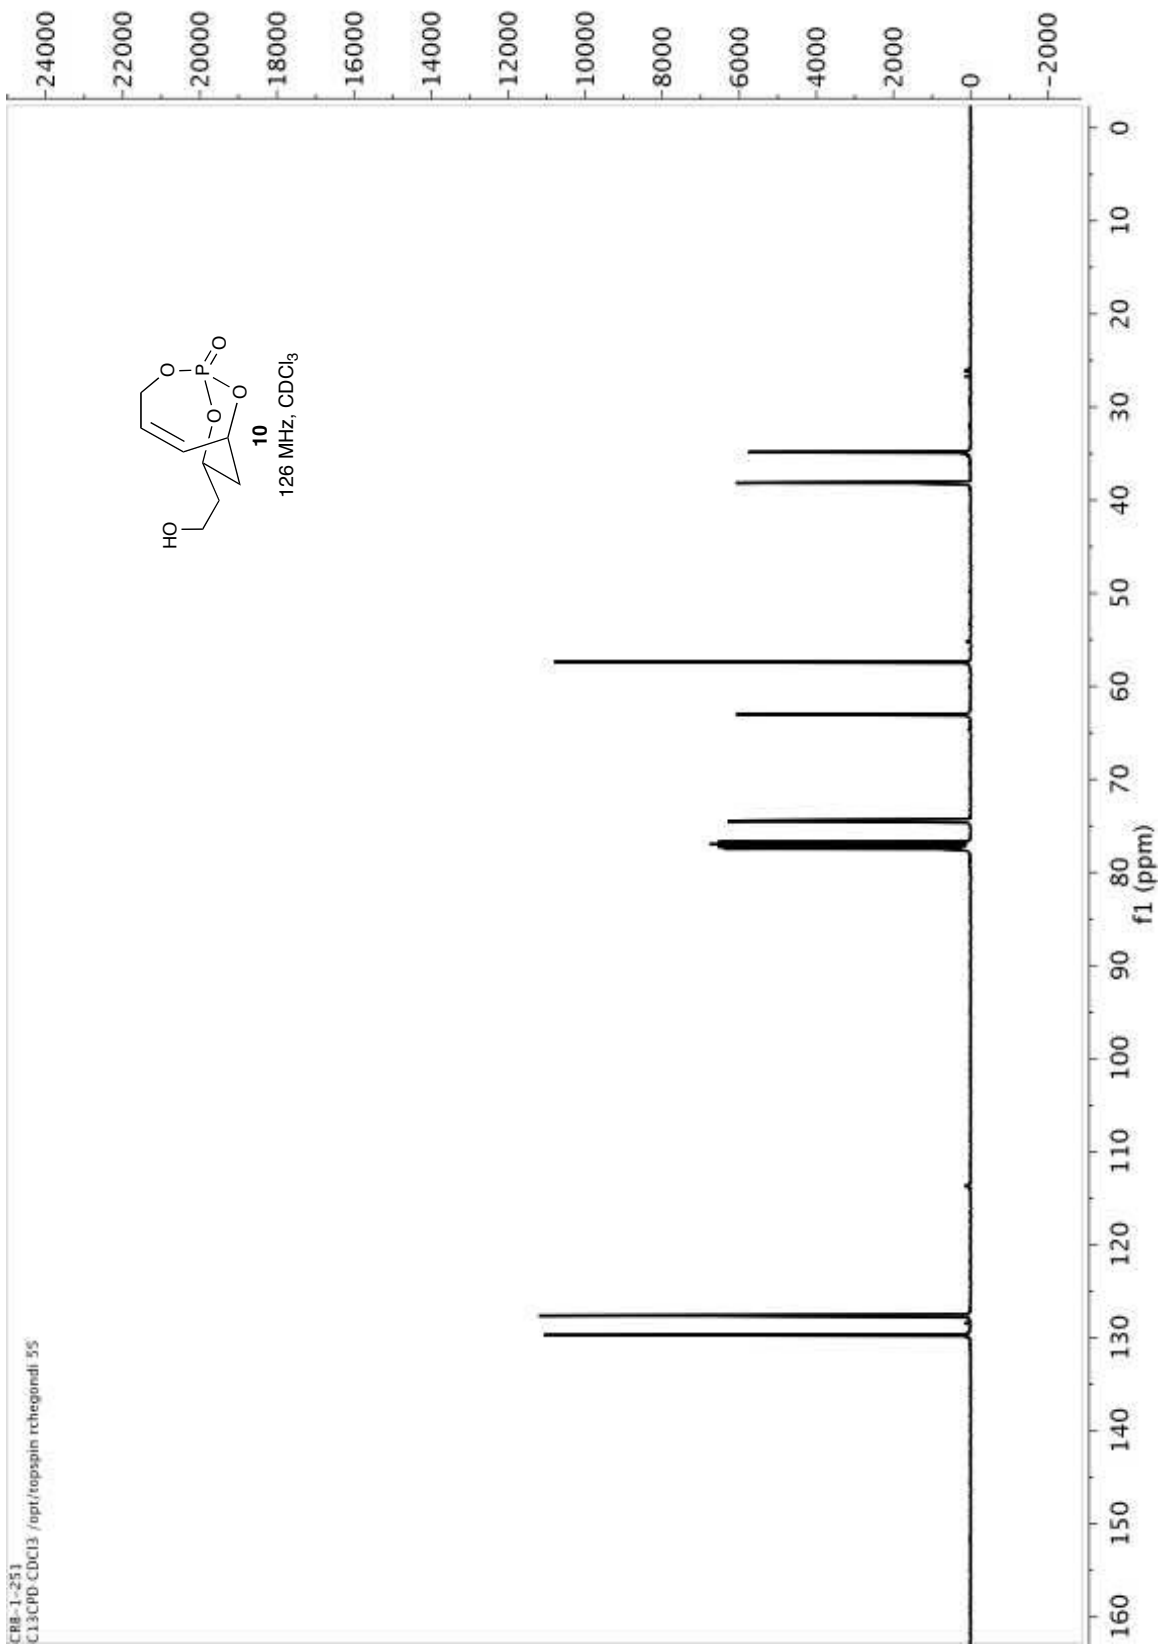

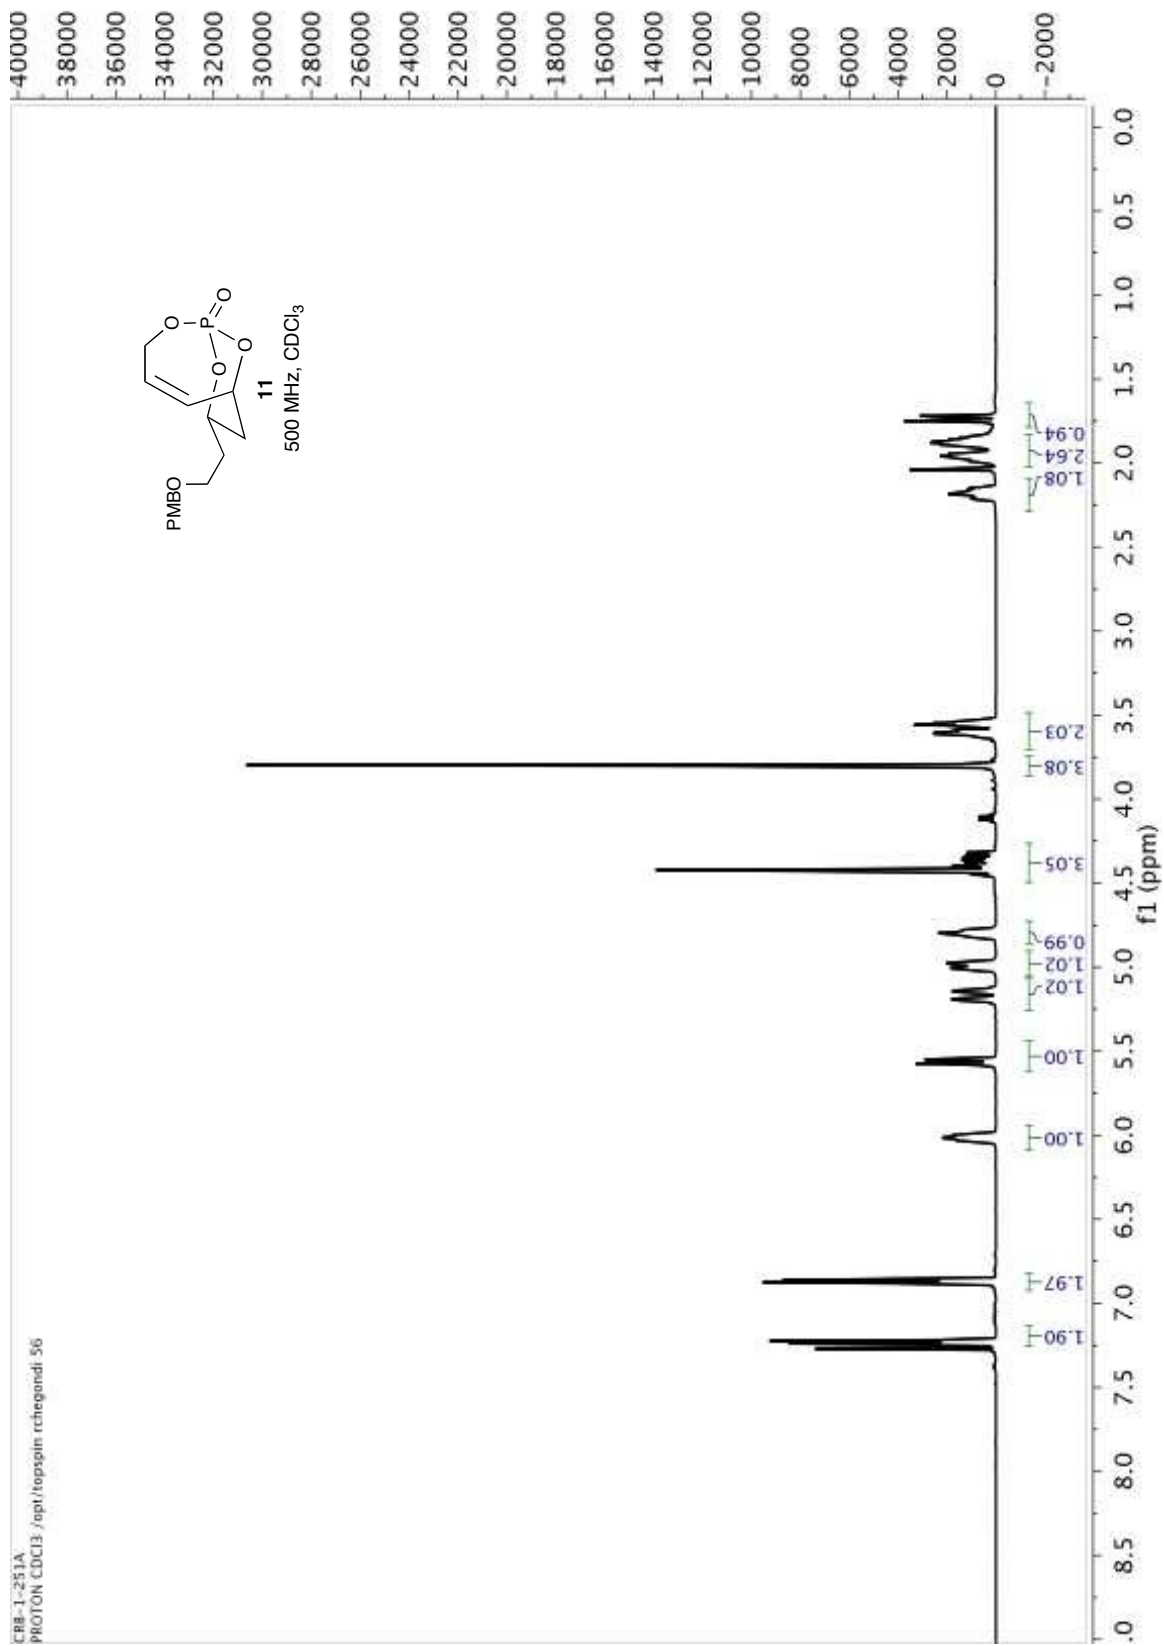

CRB-1-251A  
C13CPD-CDCl3 /opt/topspin rchegondl 56

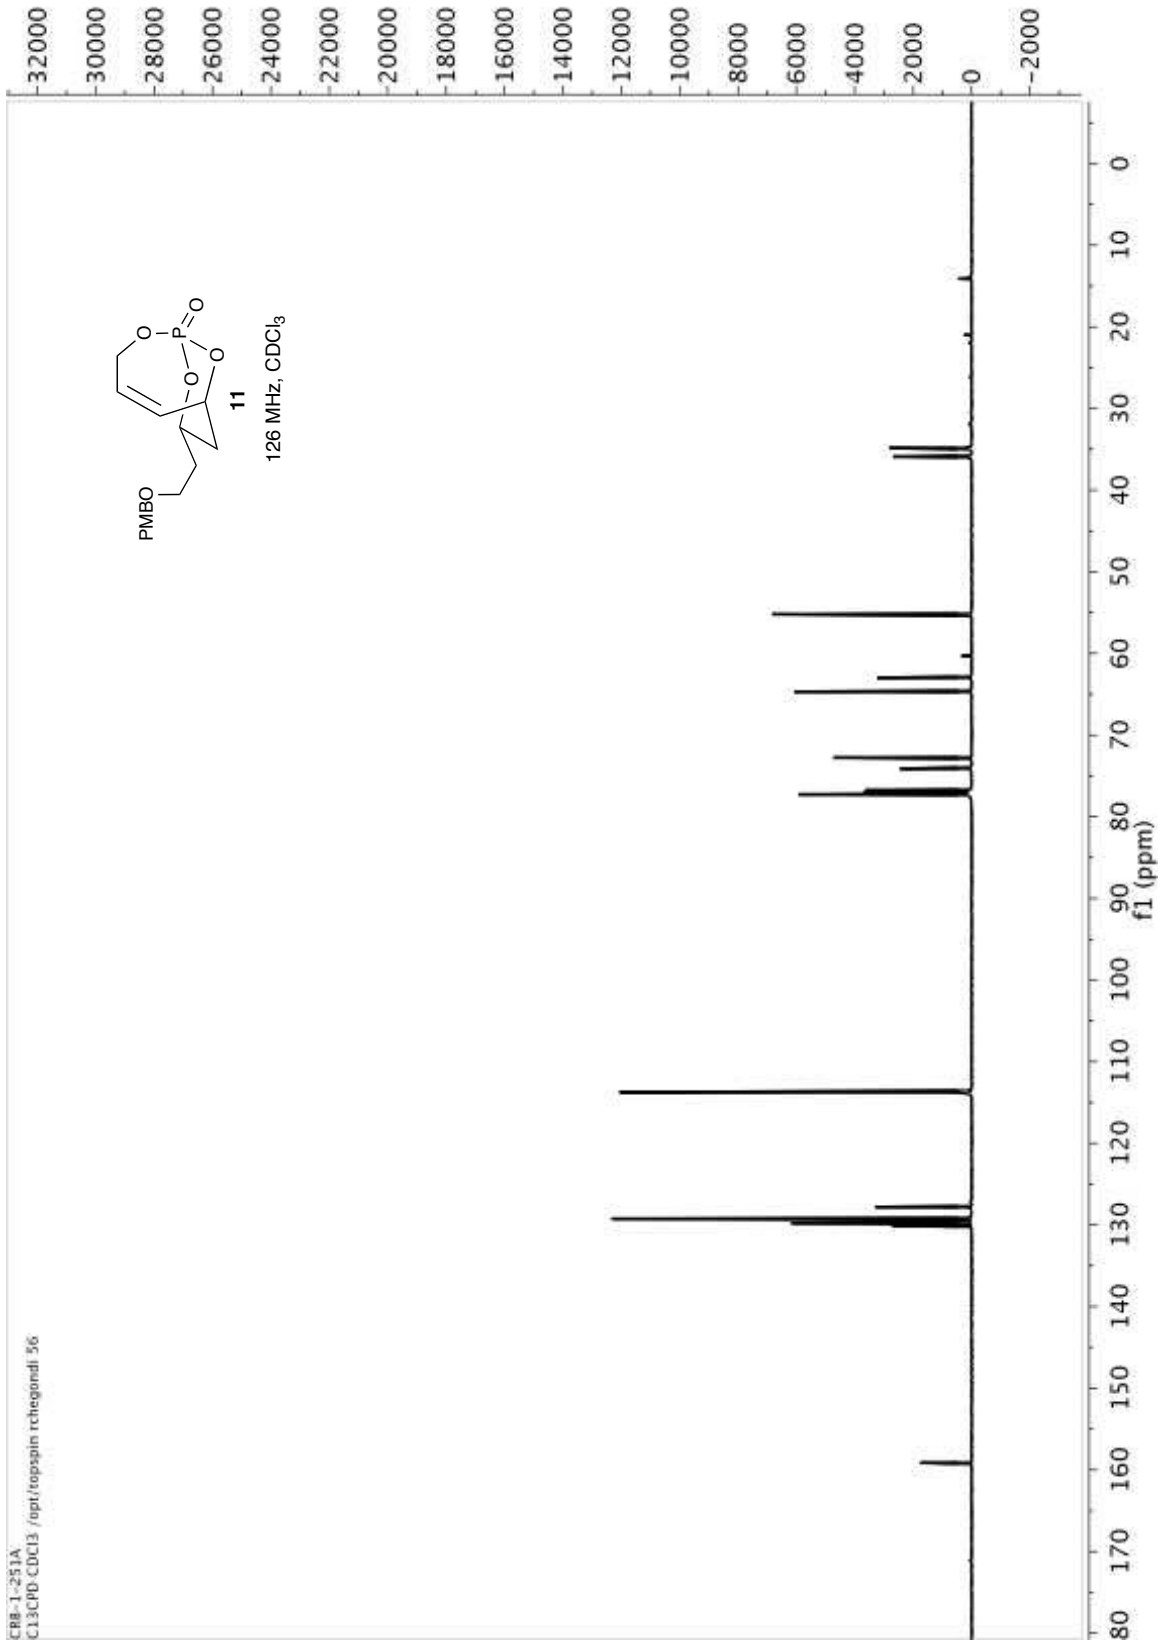

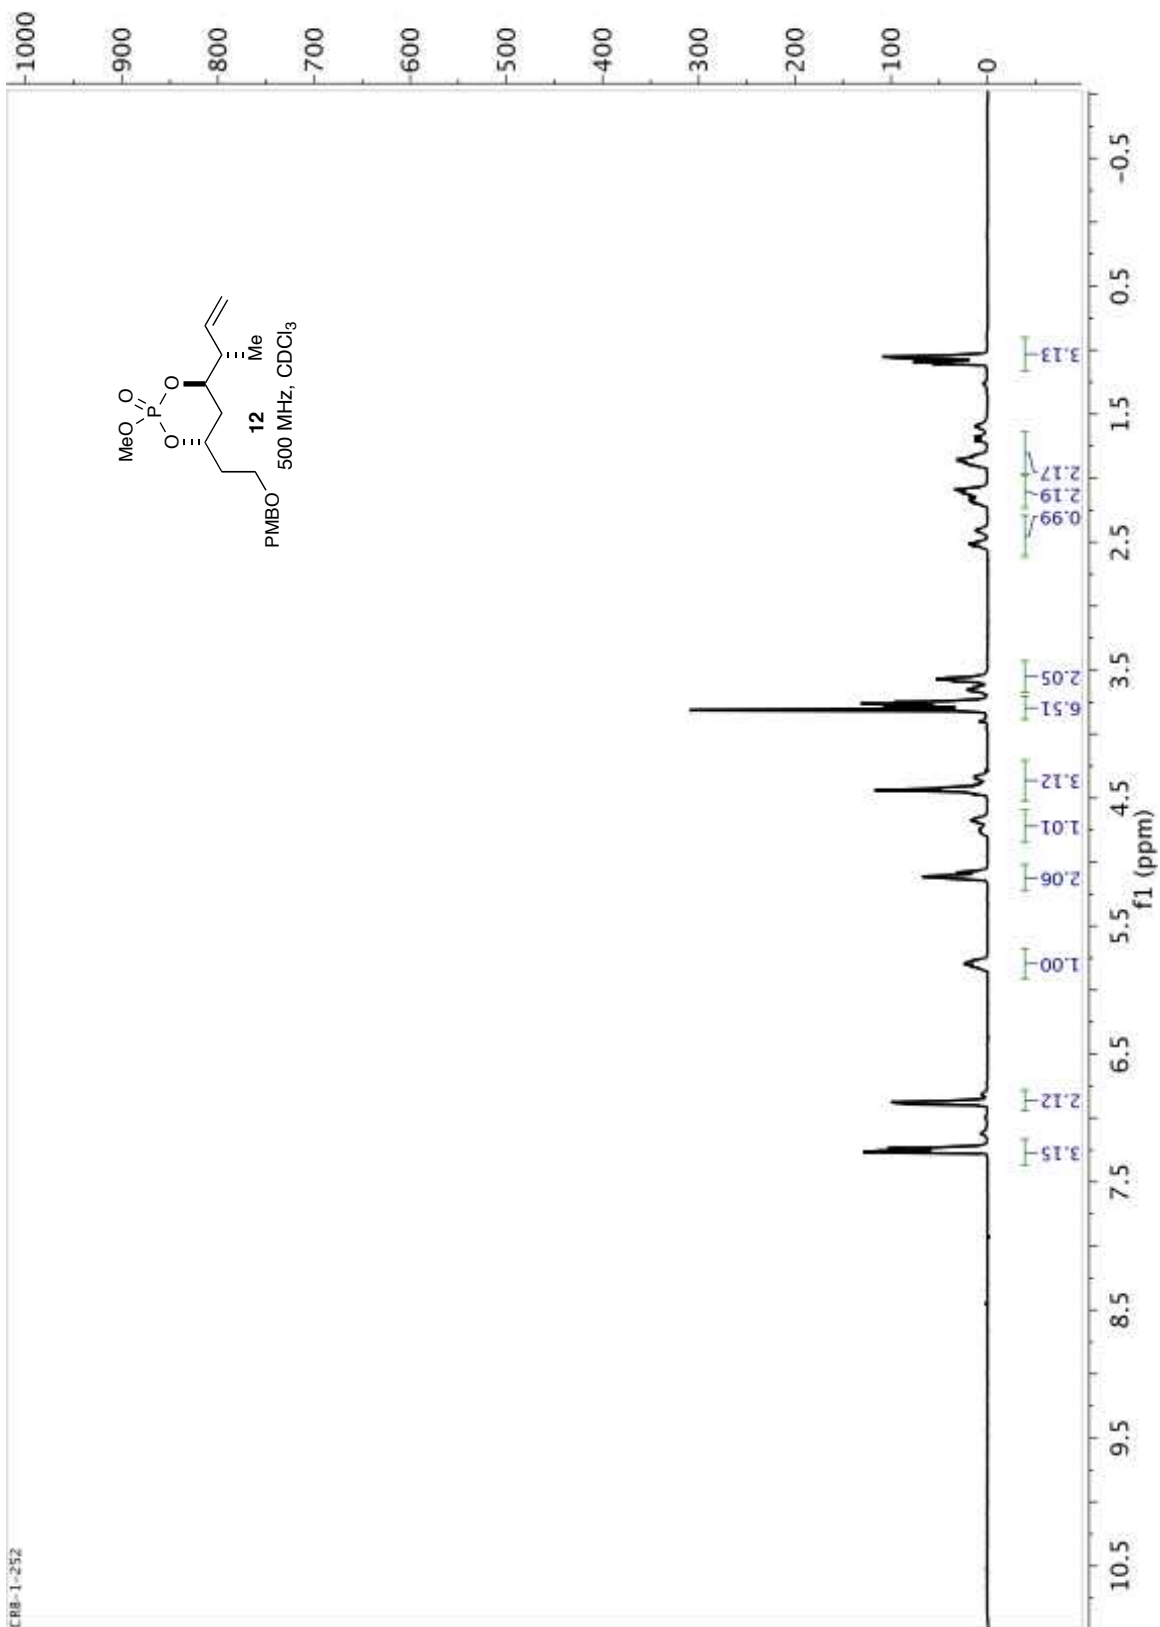

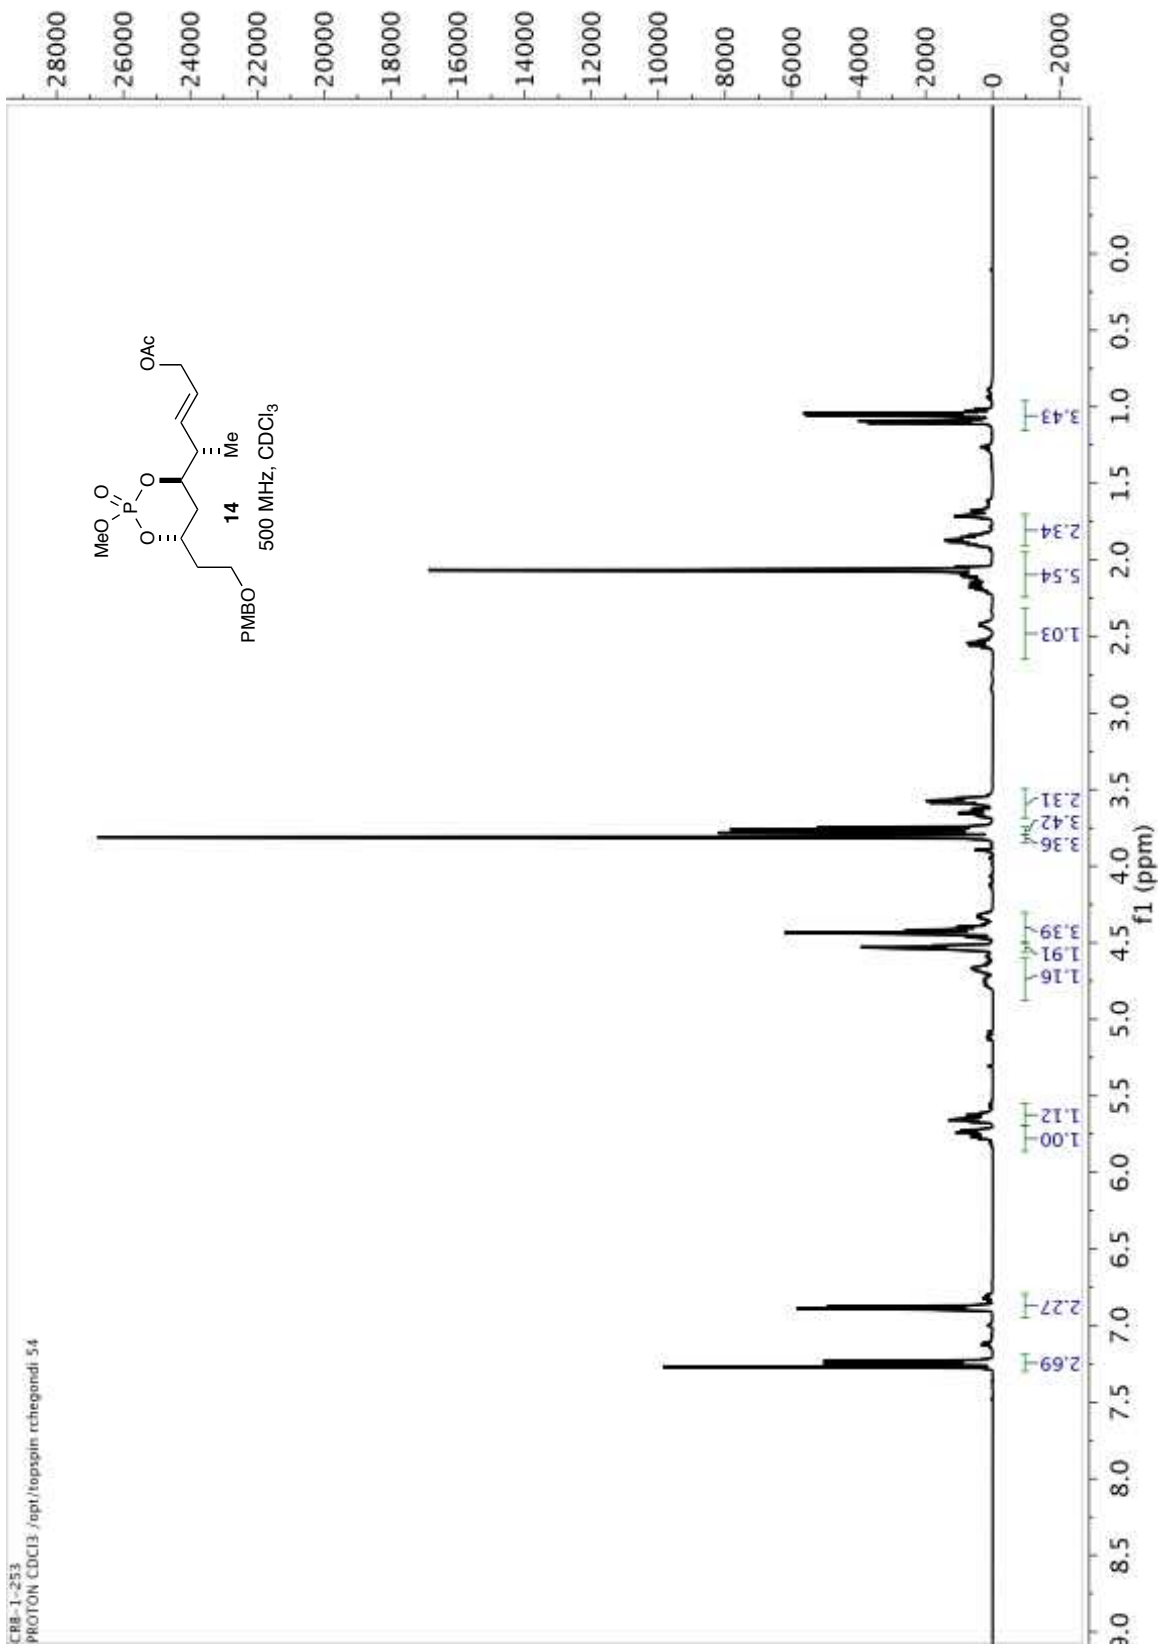

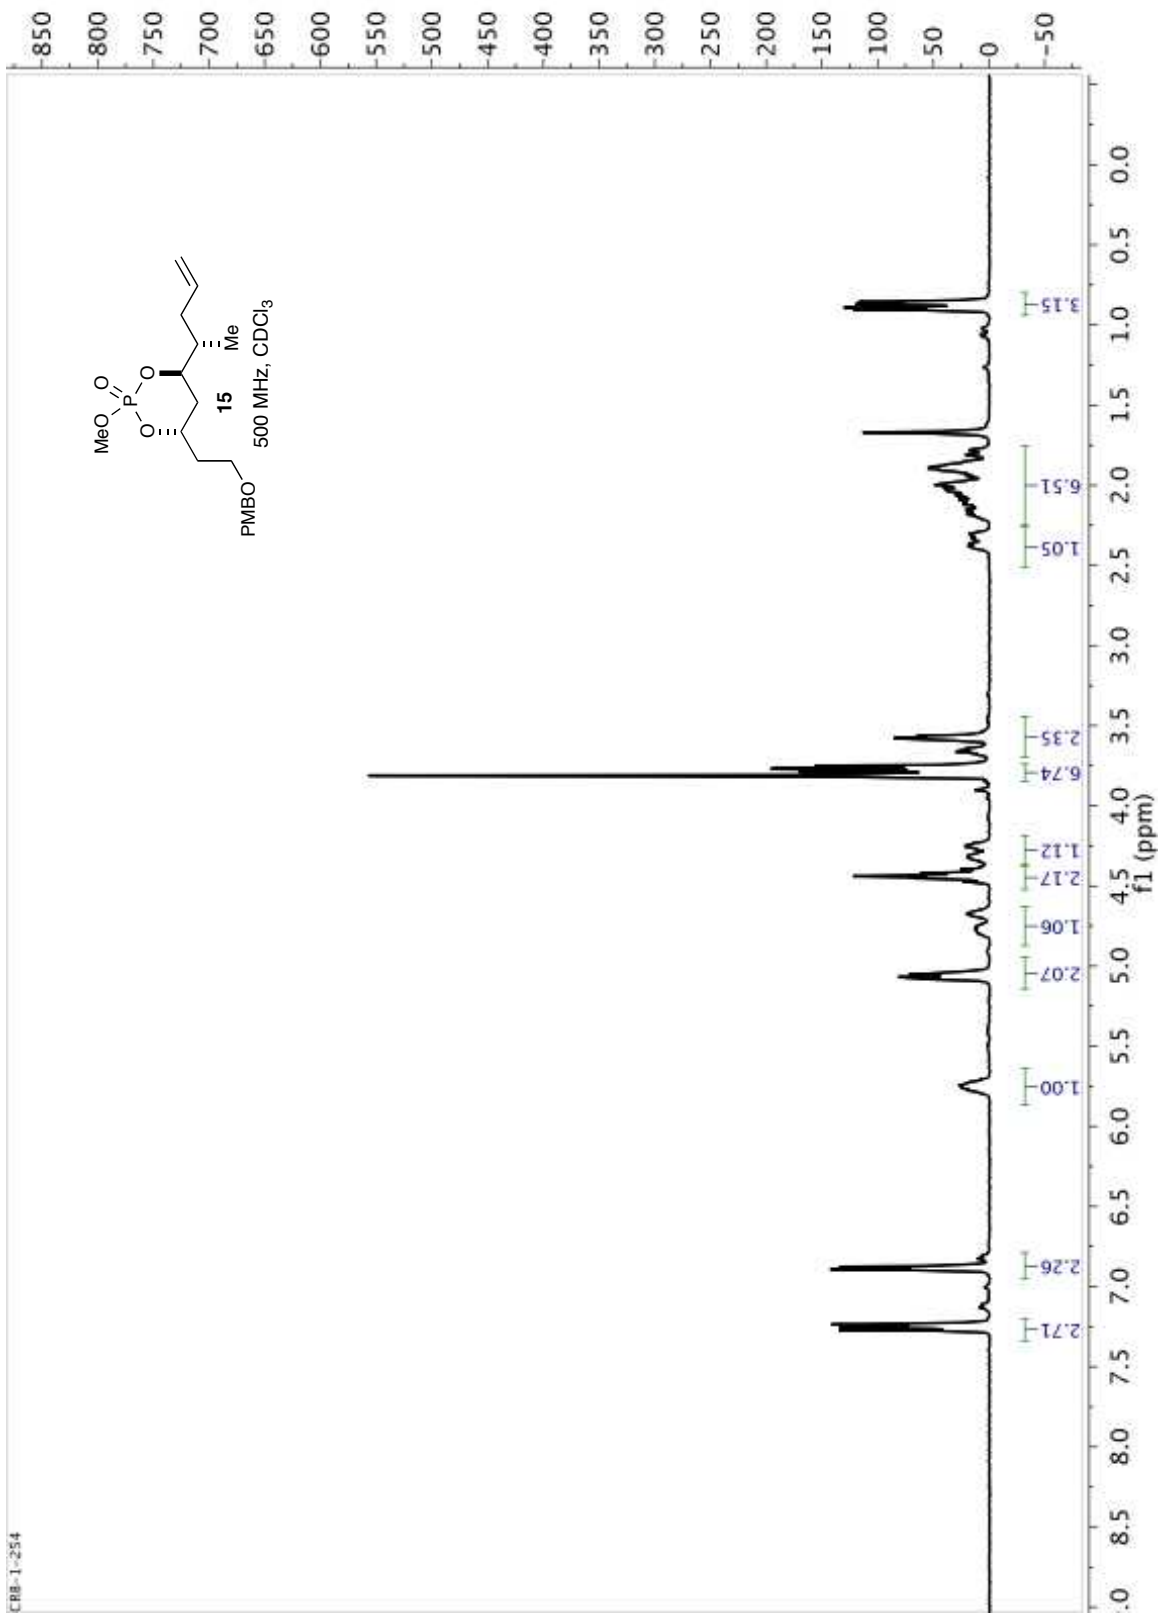



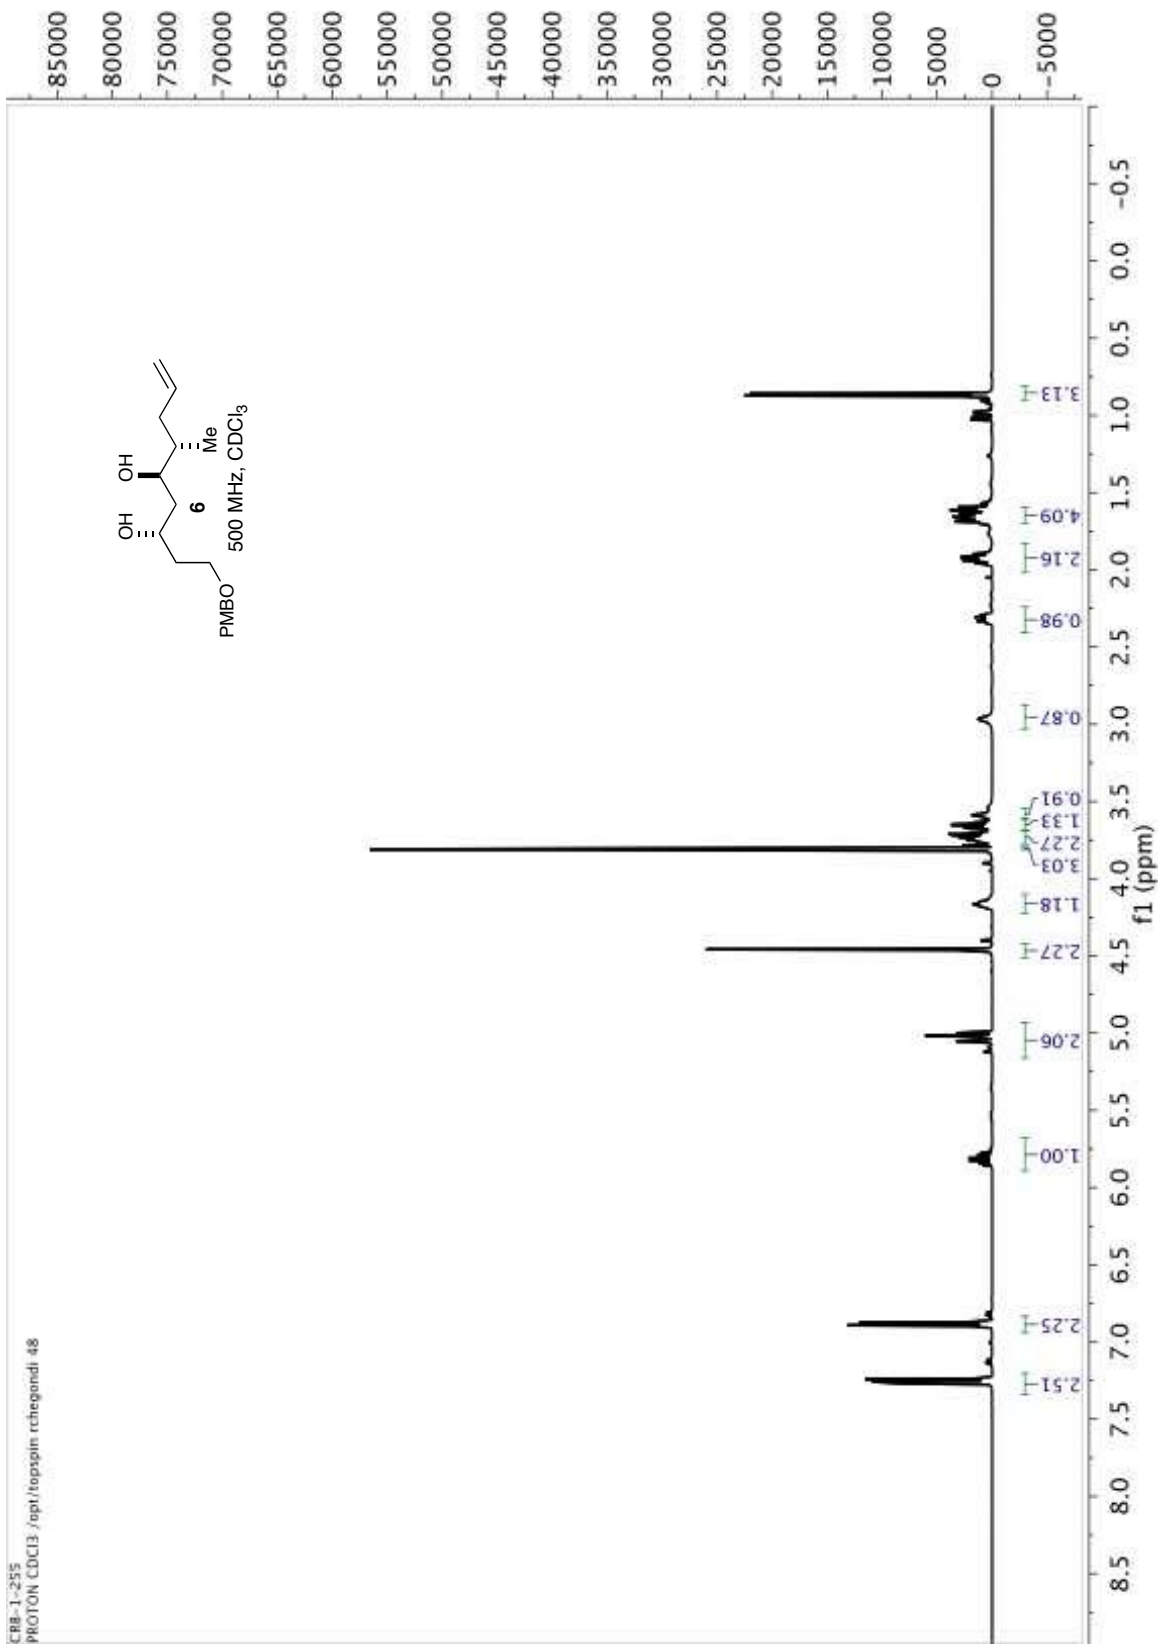

ERB-1-255  
C13CPD-CDCl3 /opt/topspin rchegondi\_48

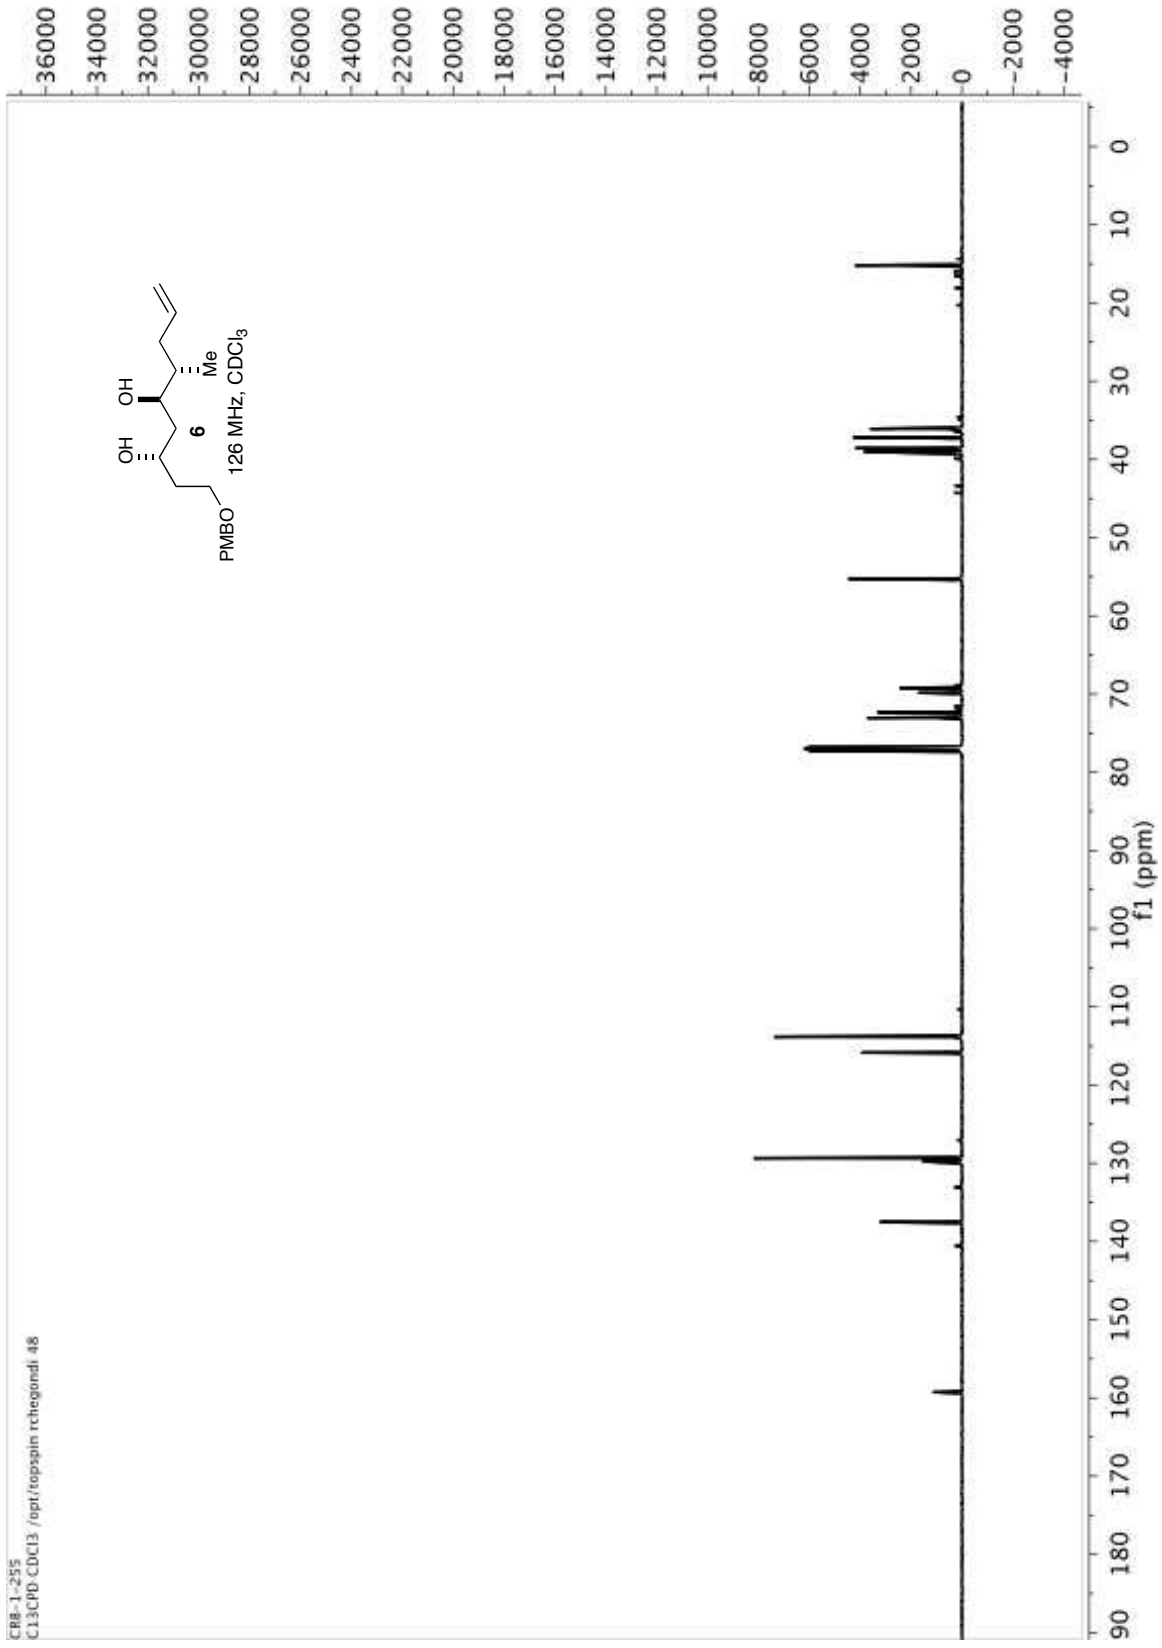

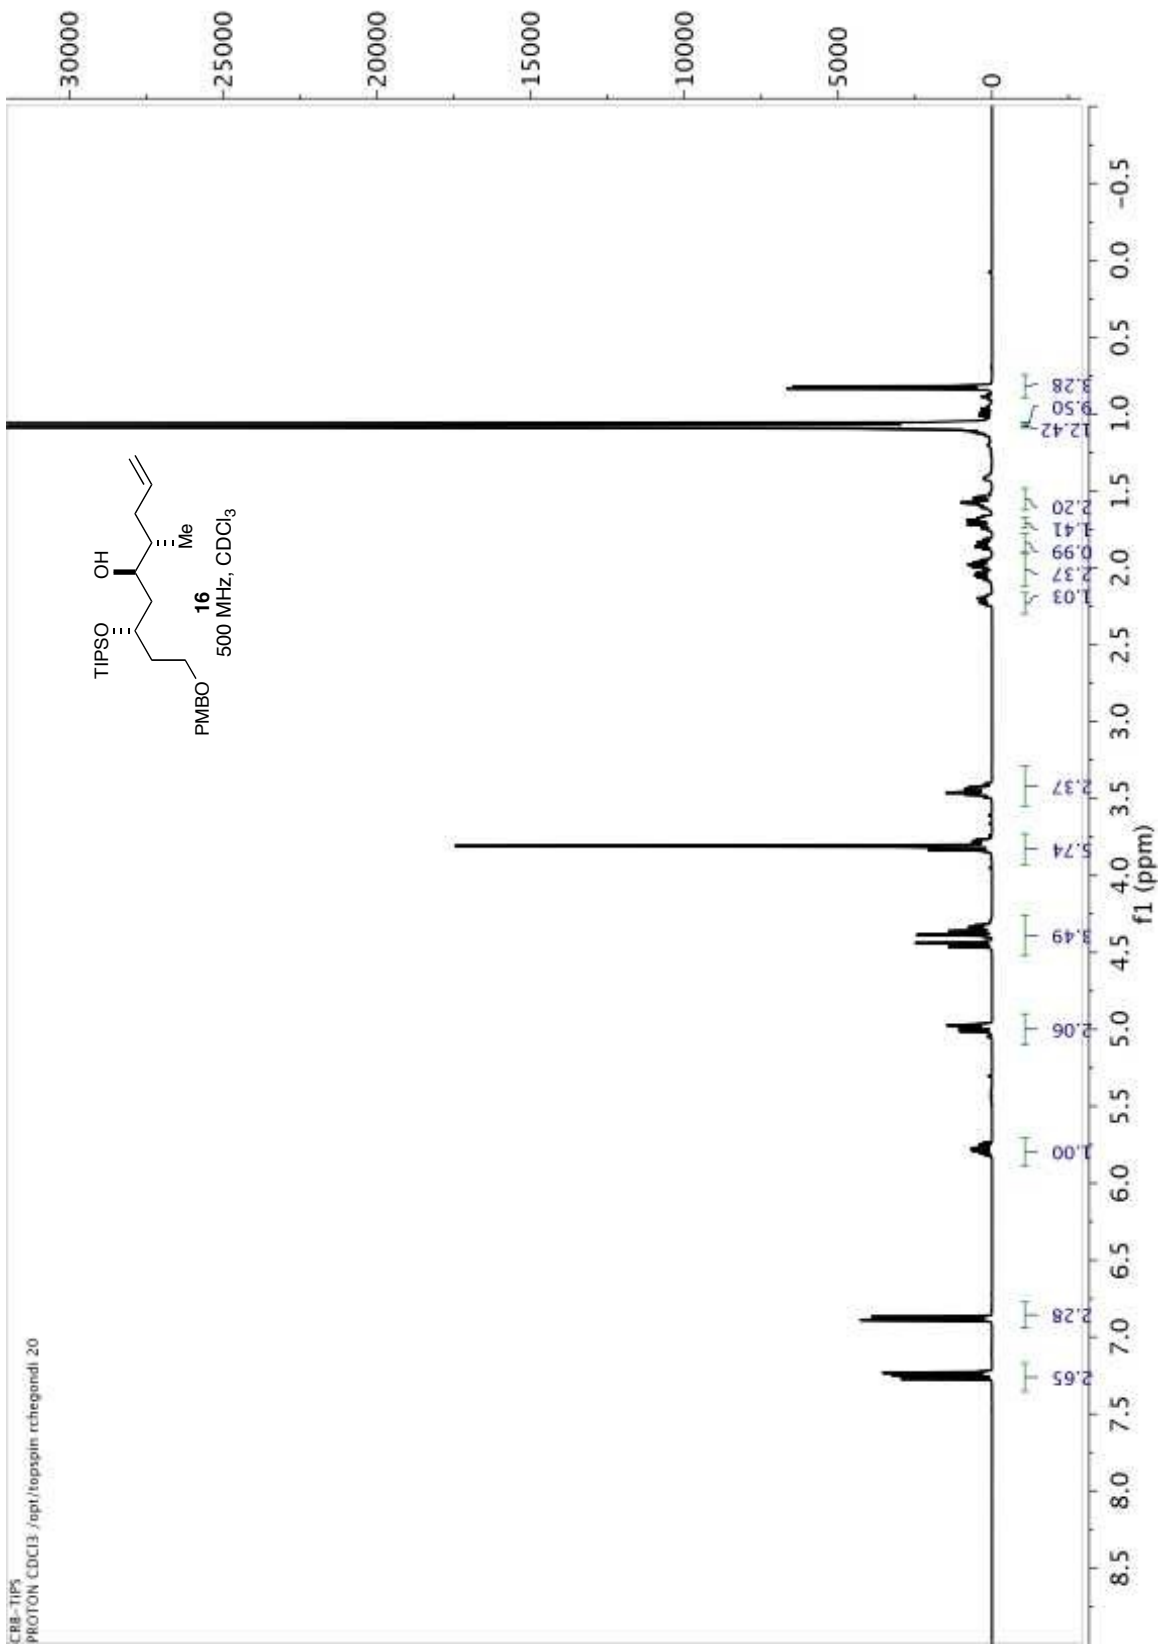

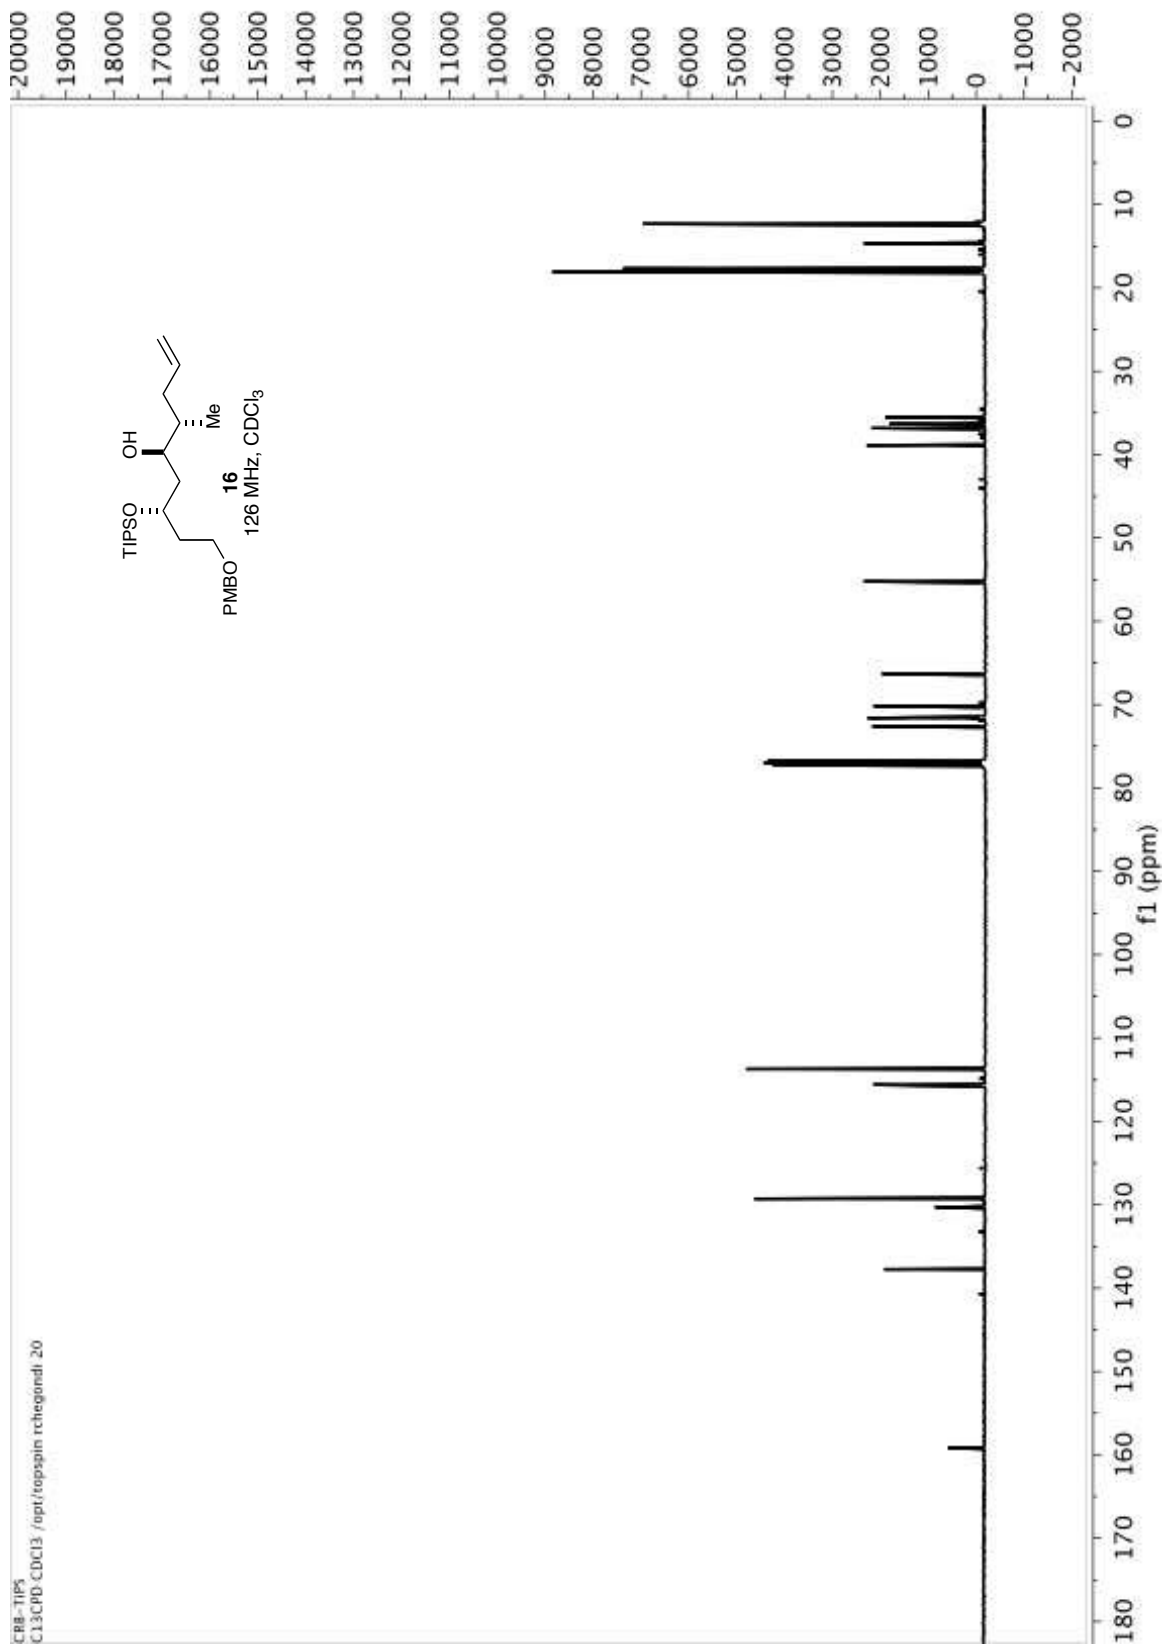

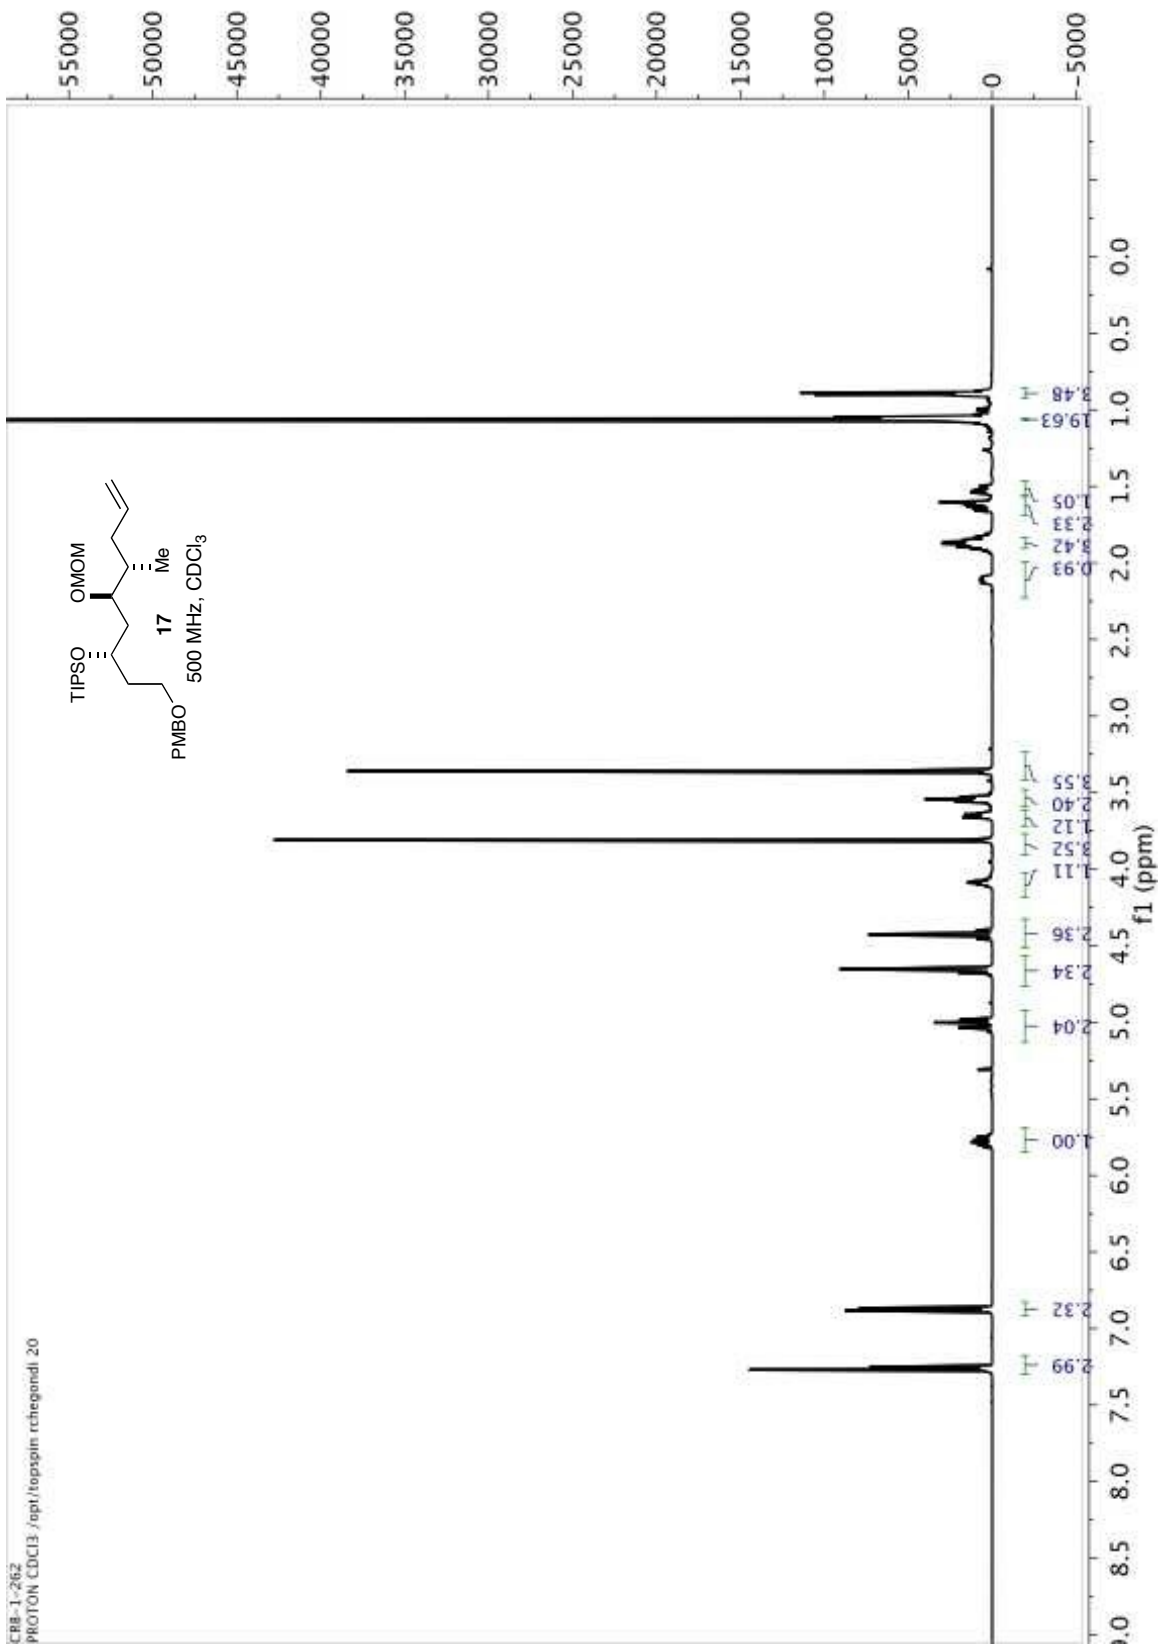

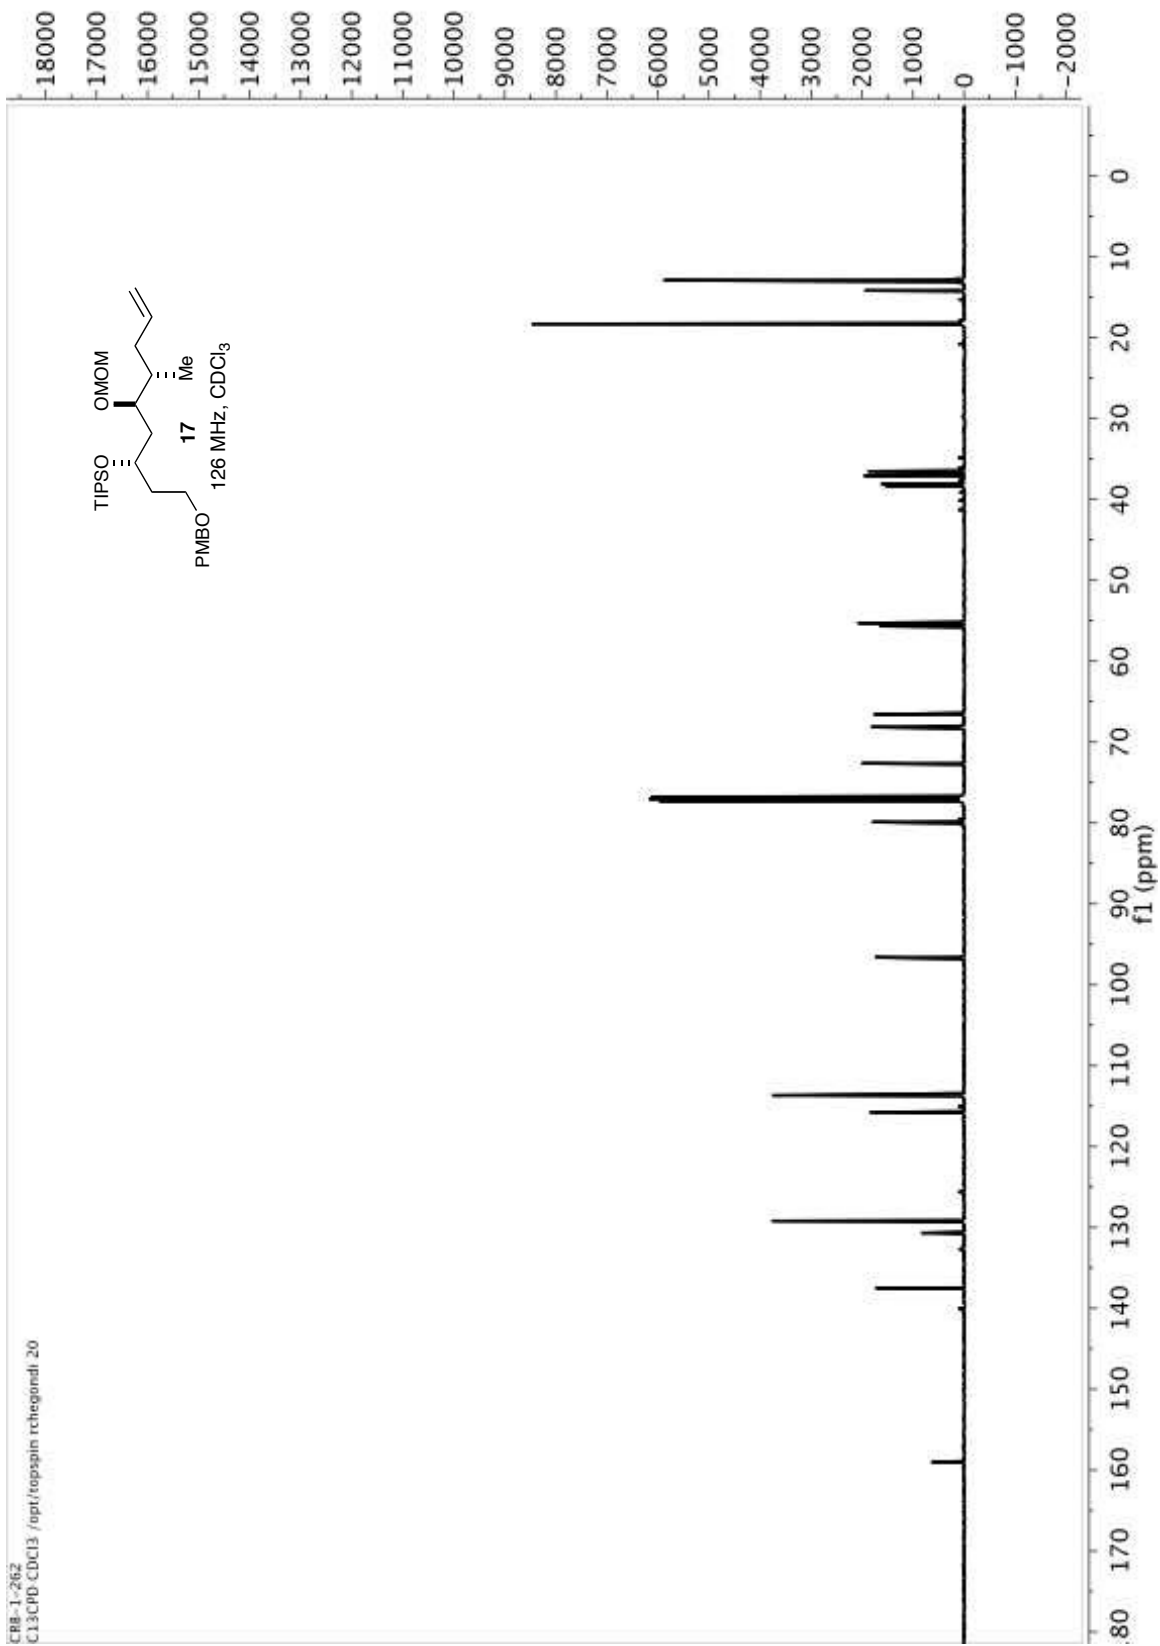

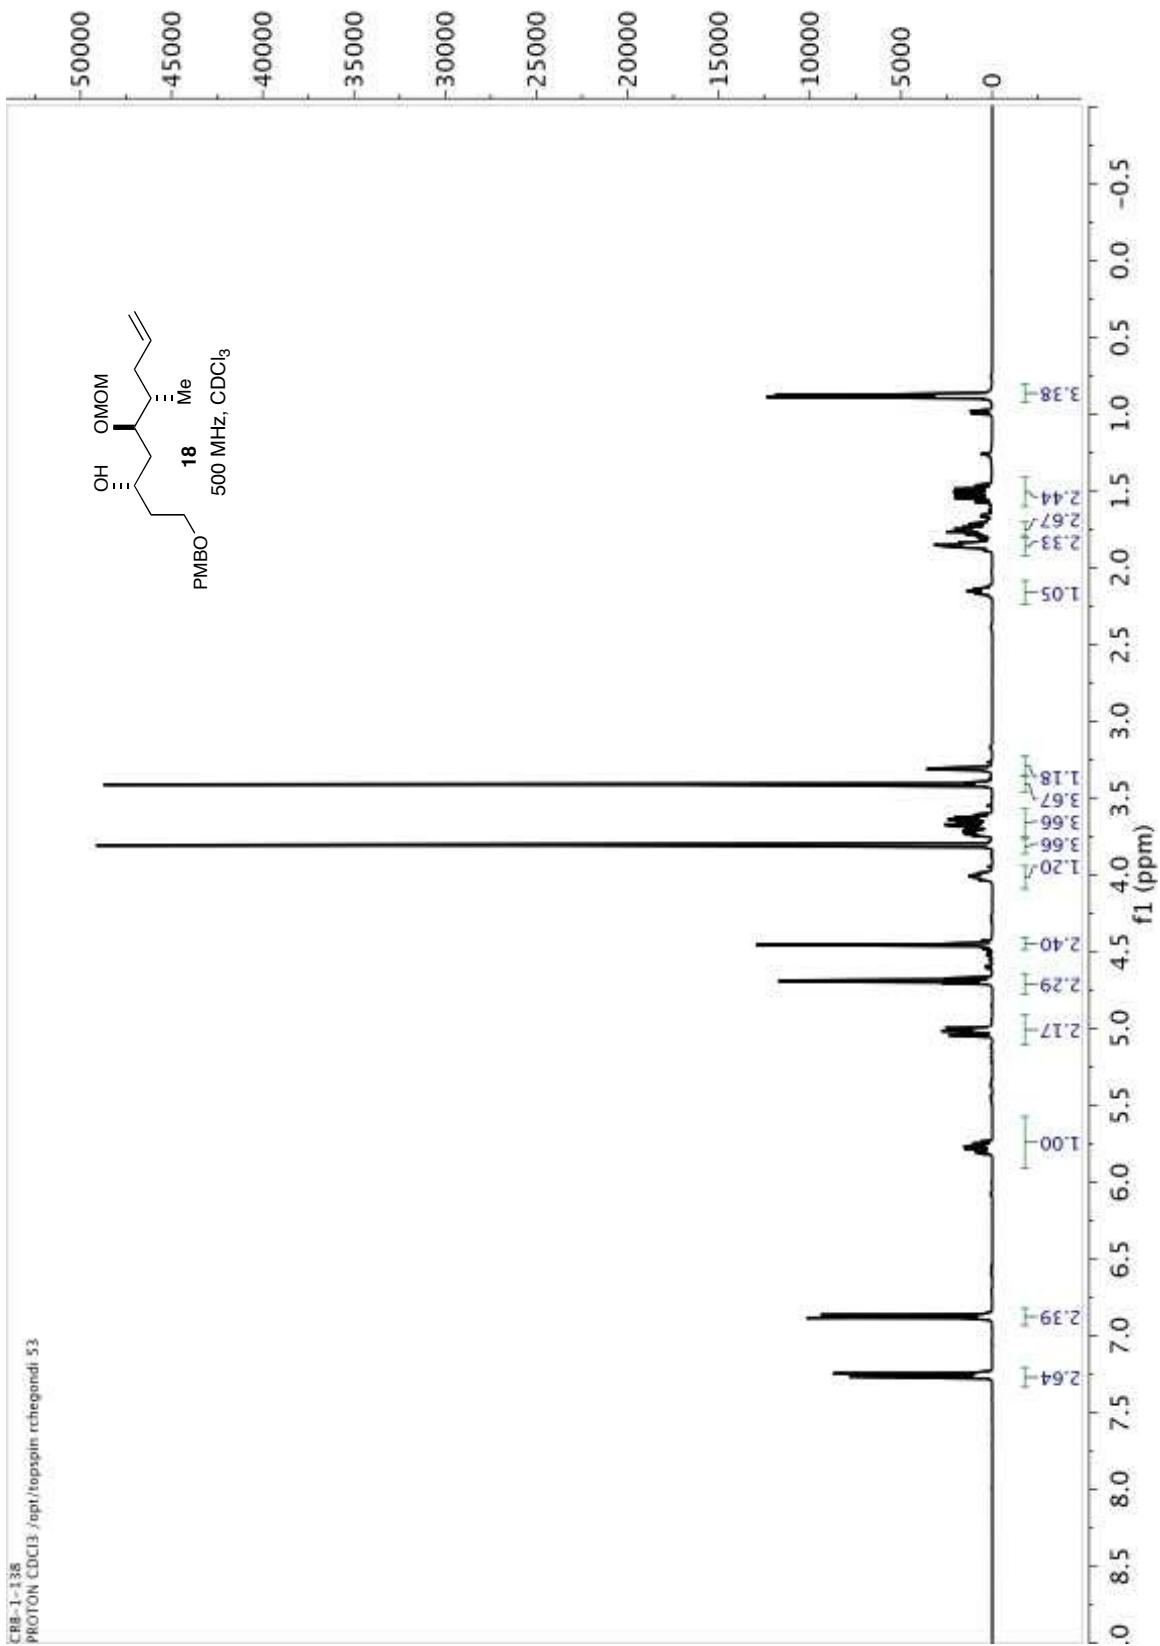

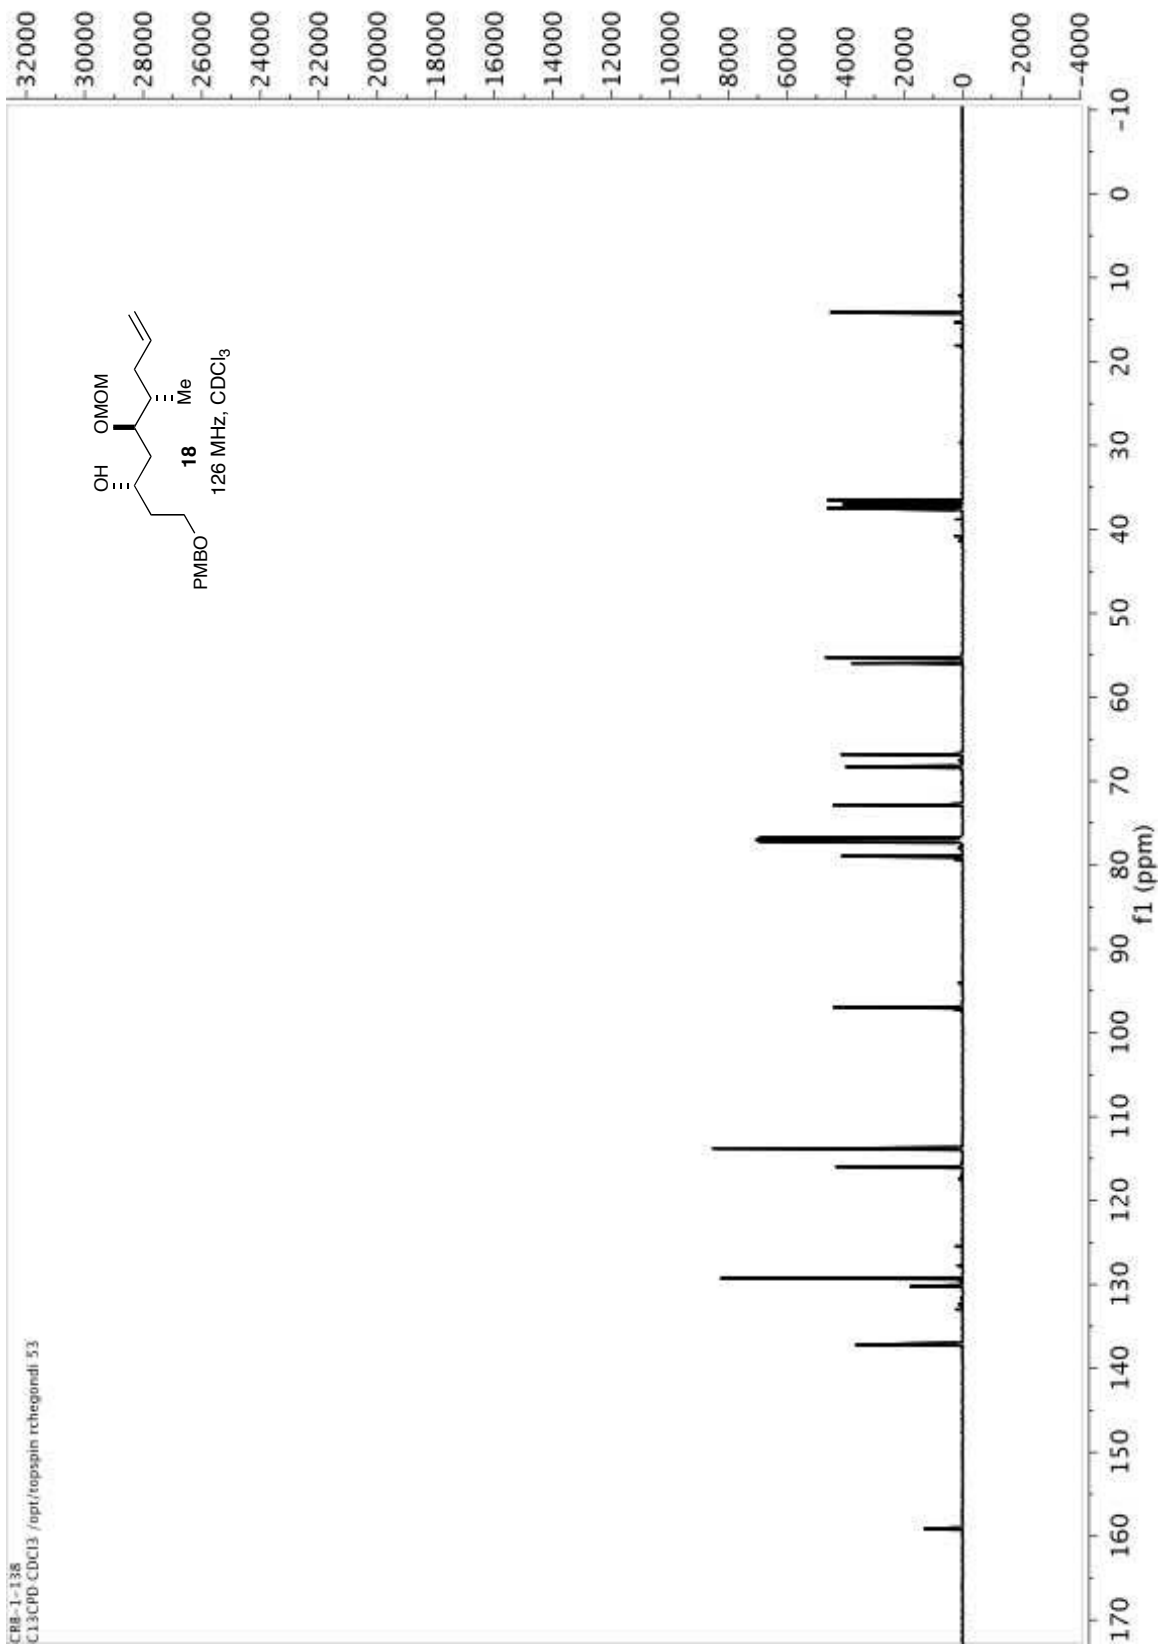



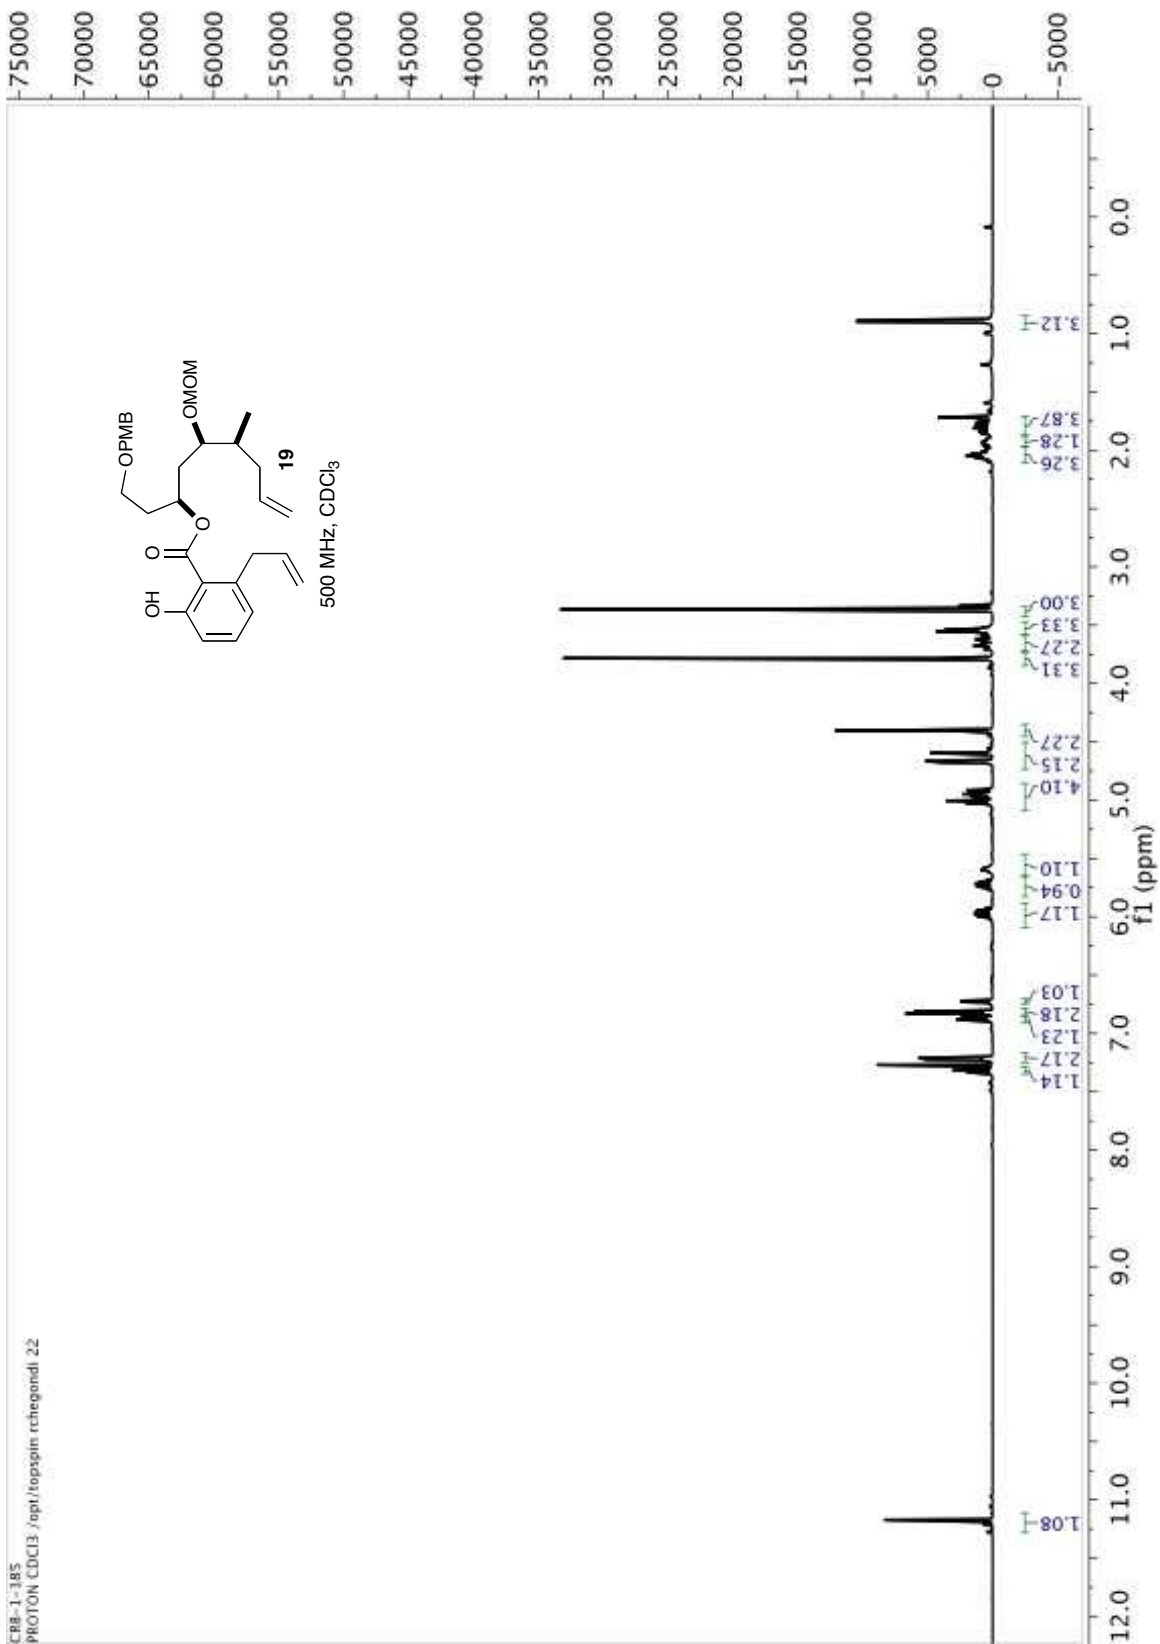

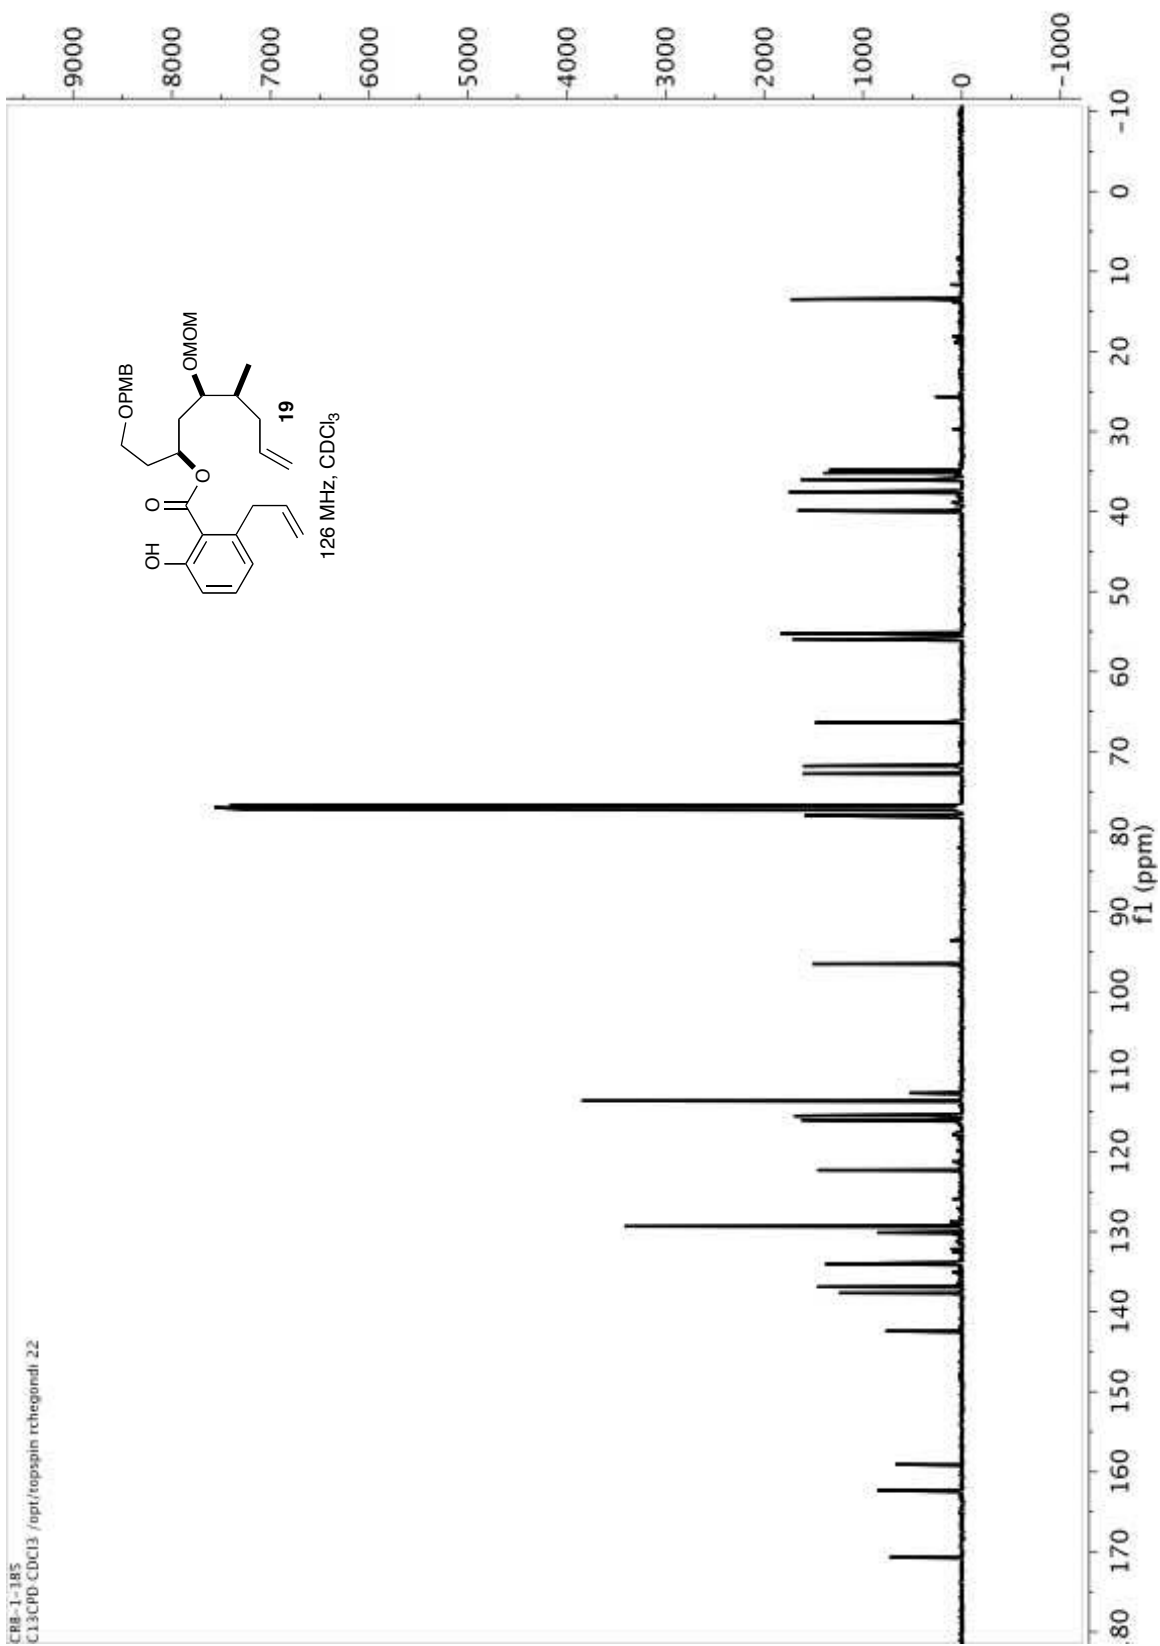

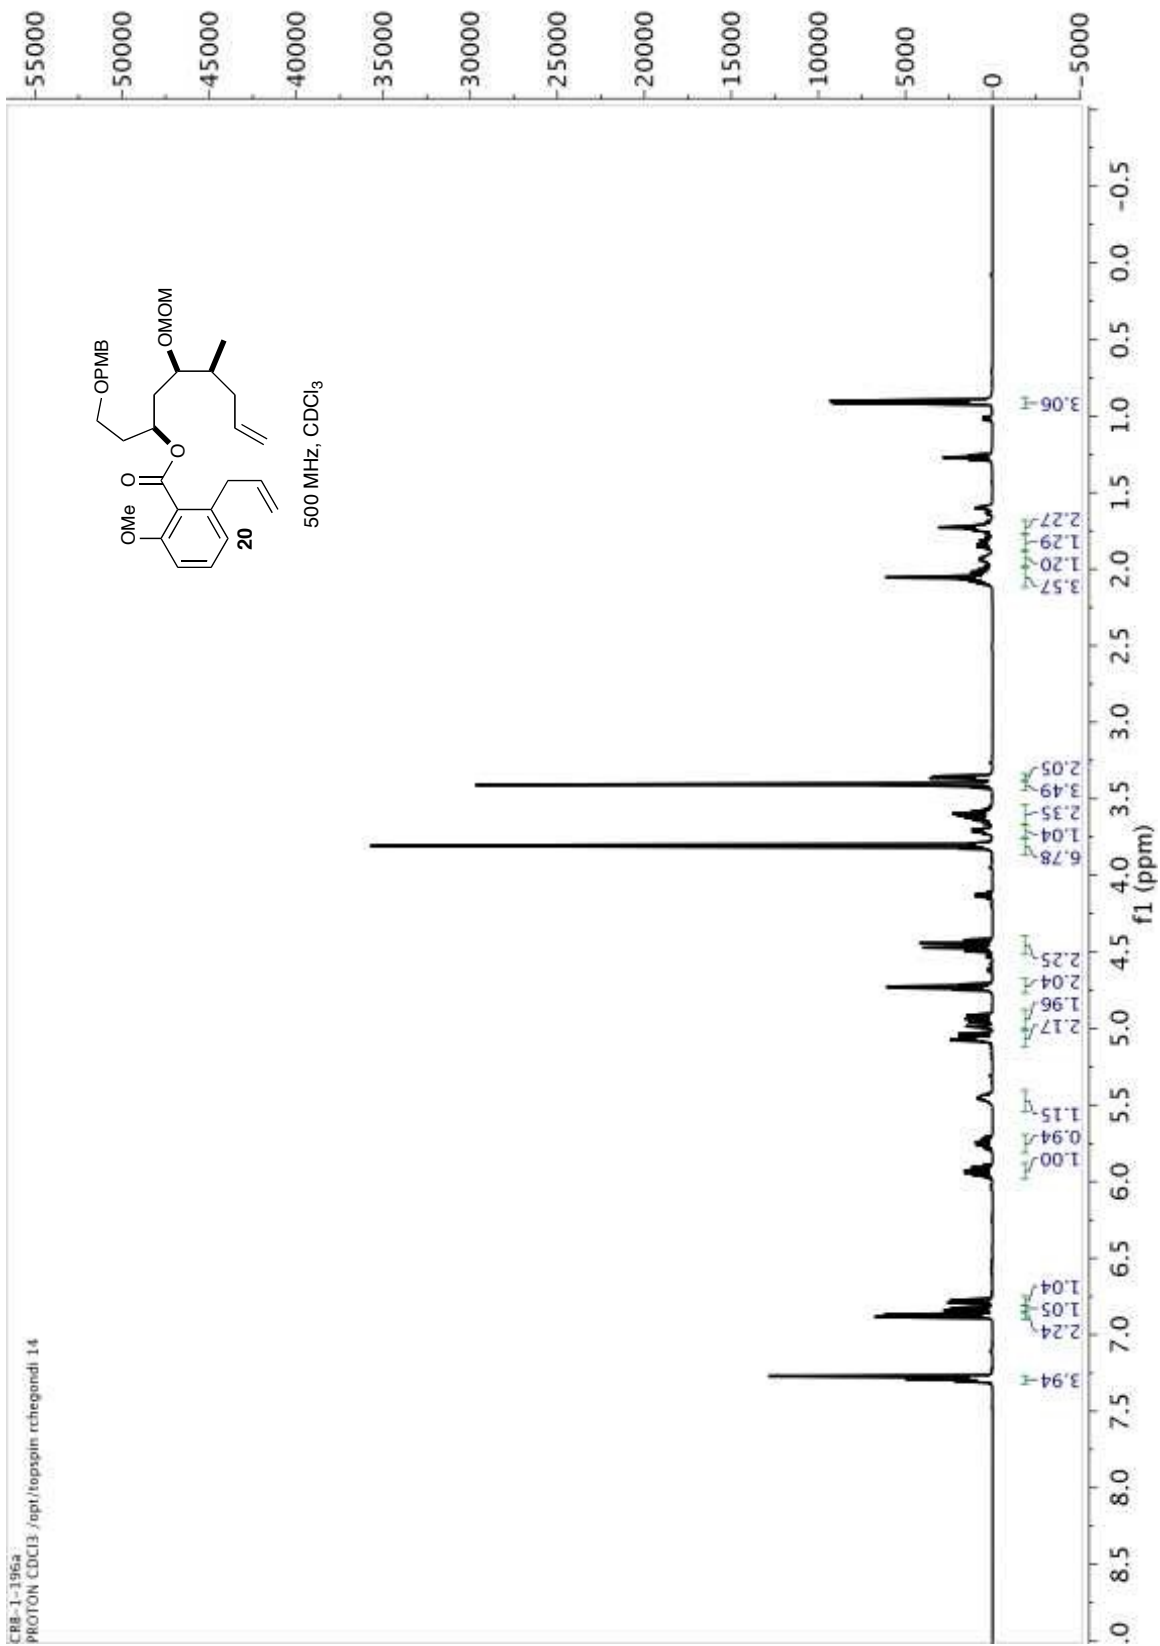

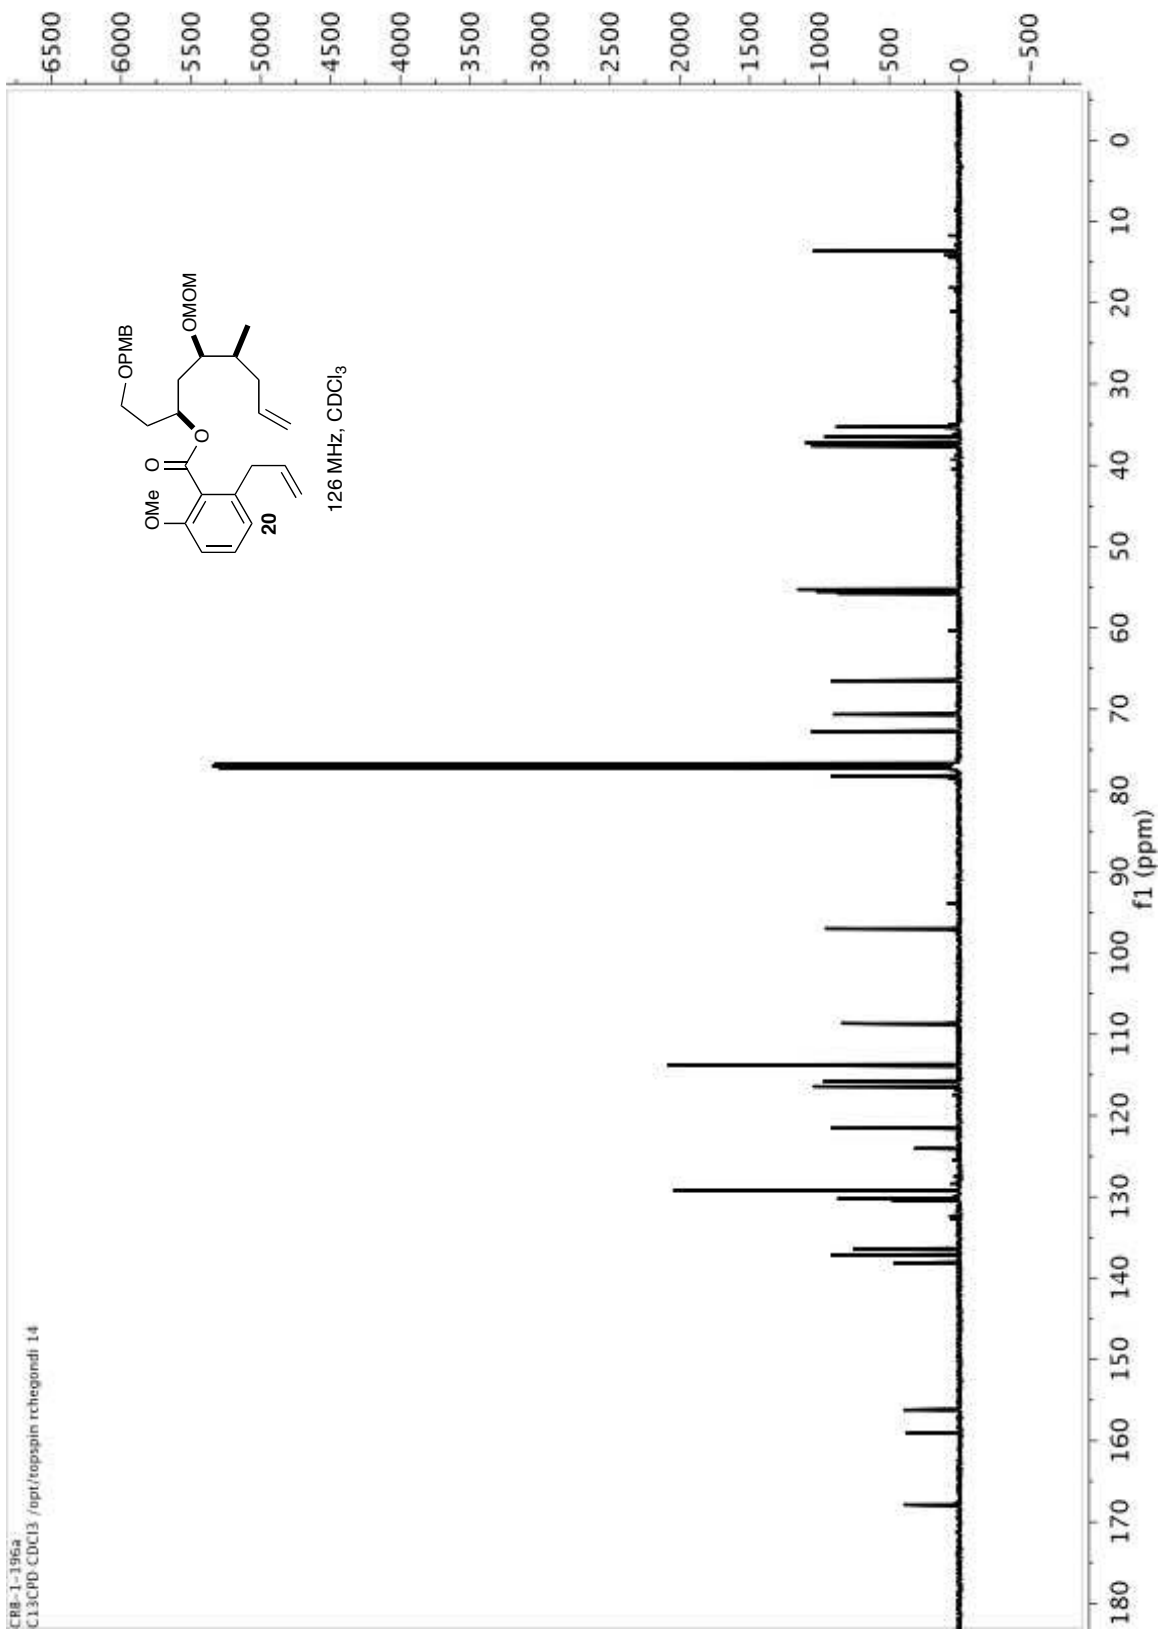

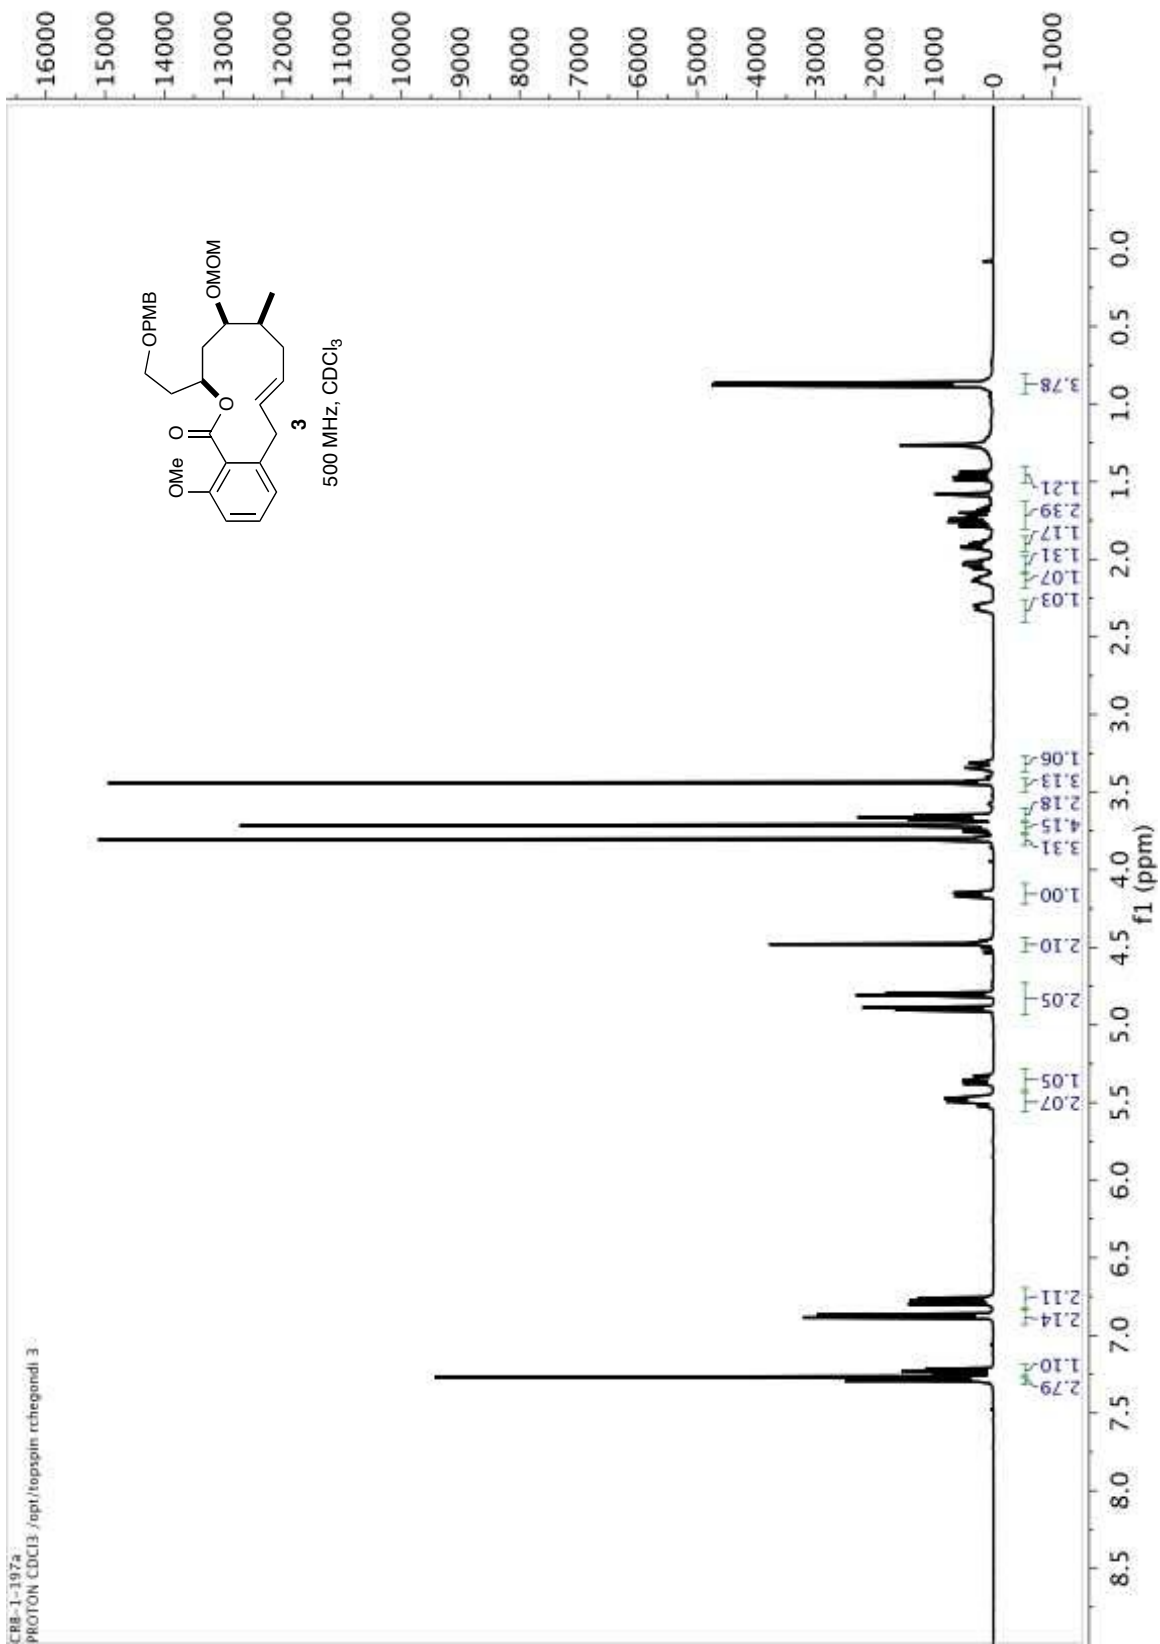

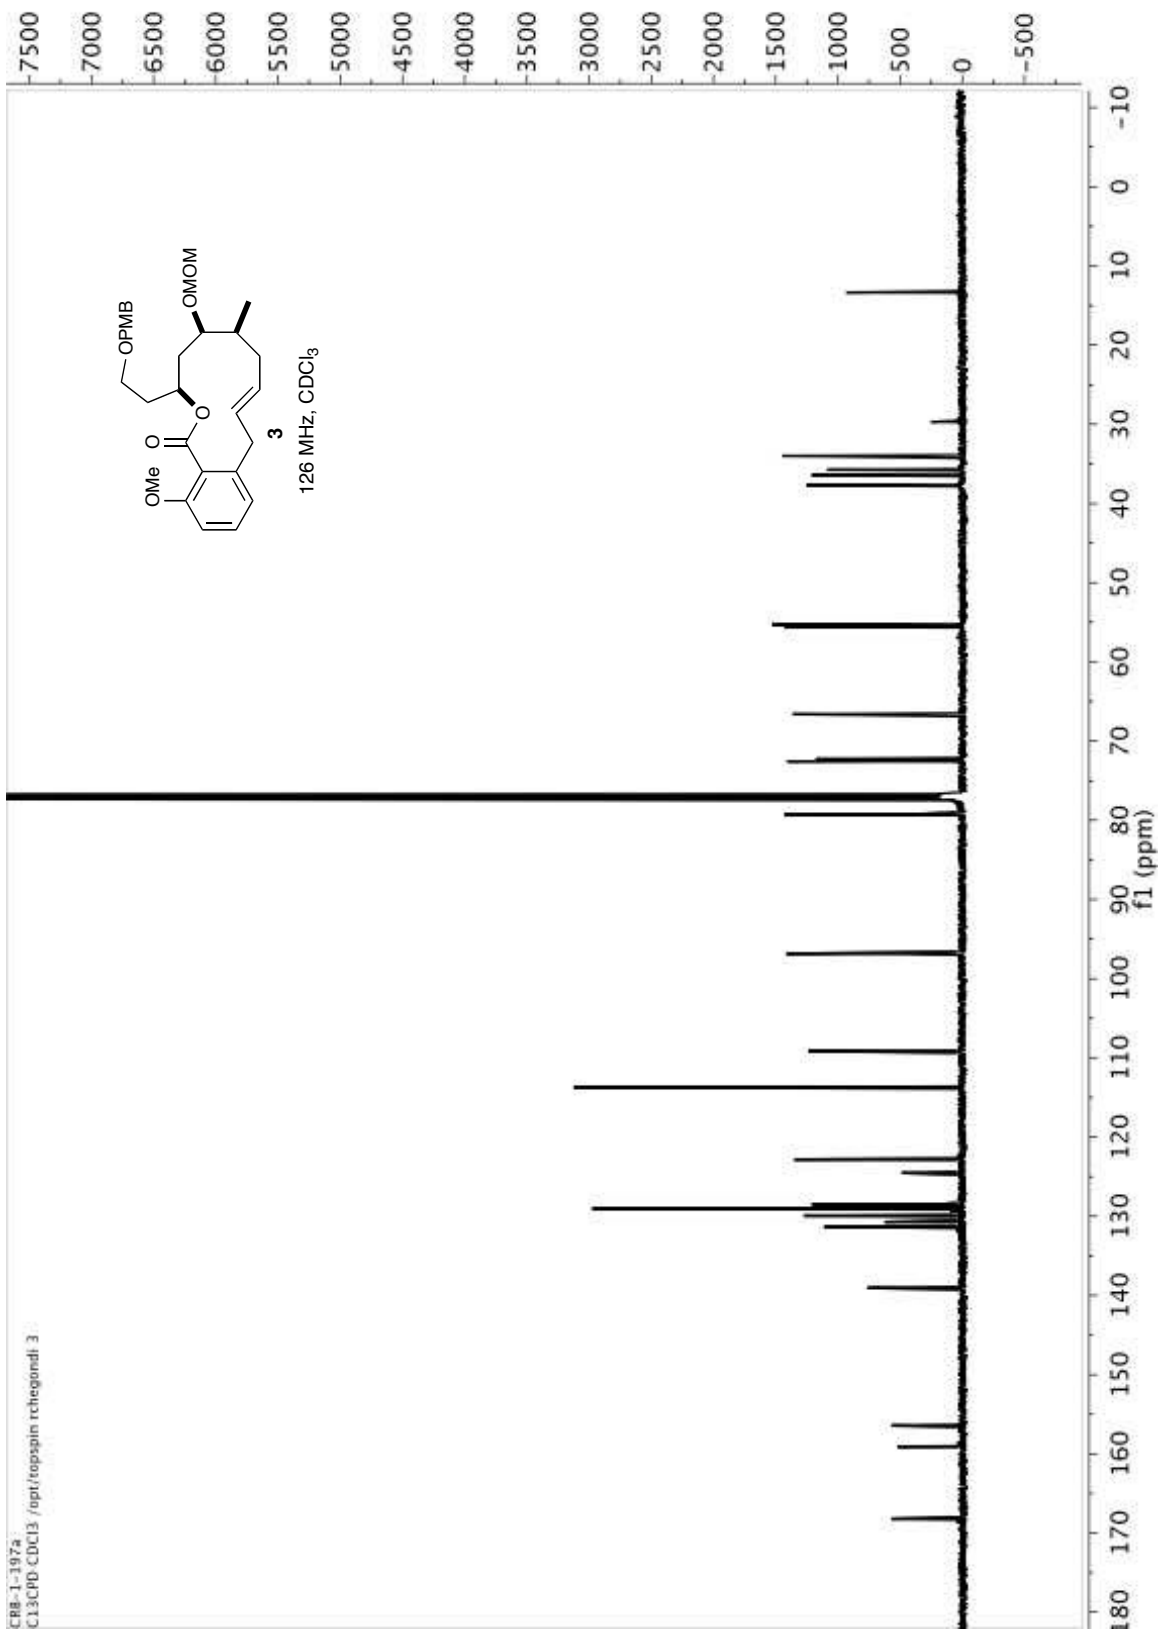

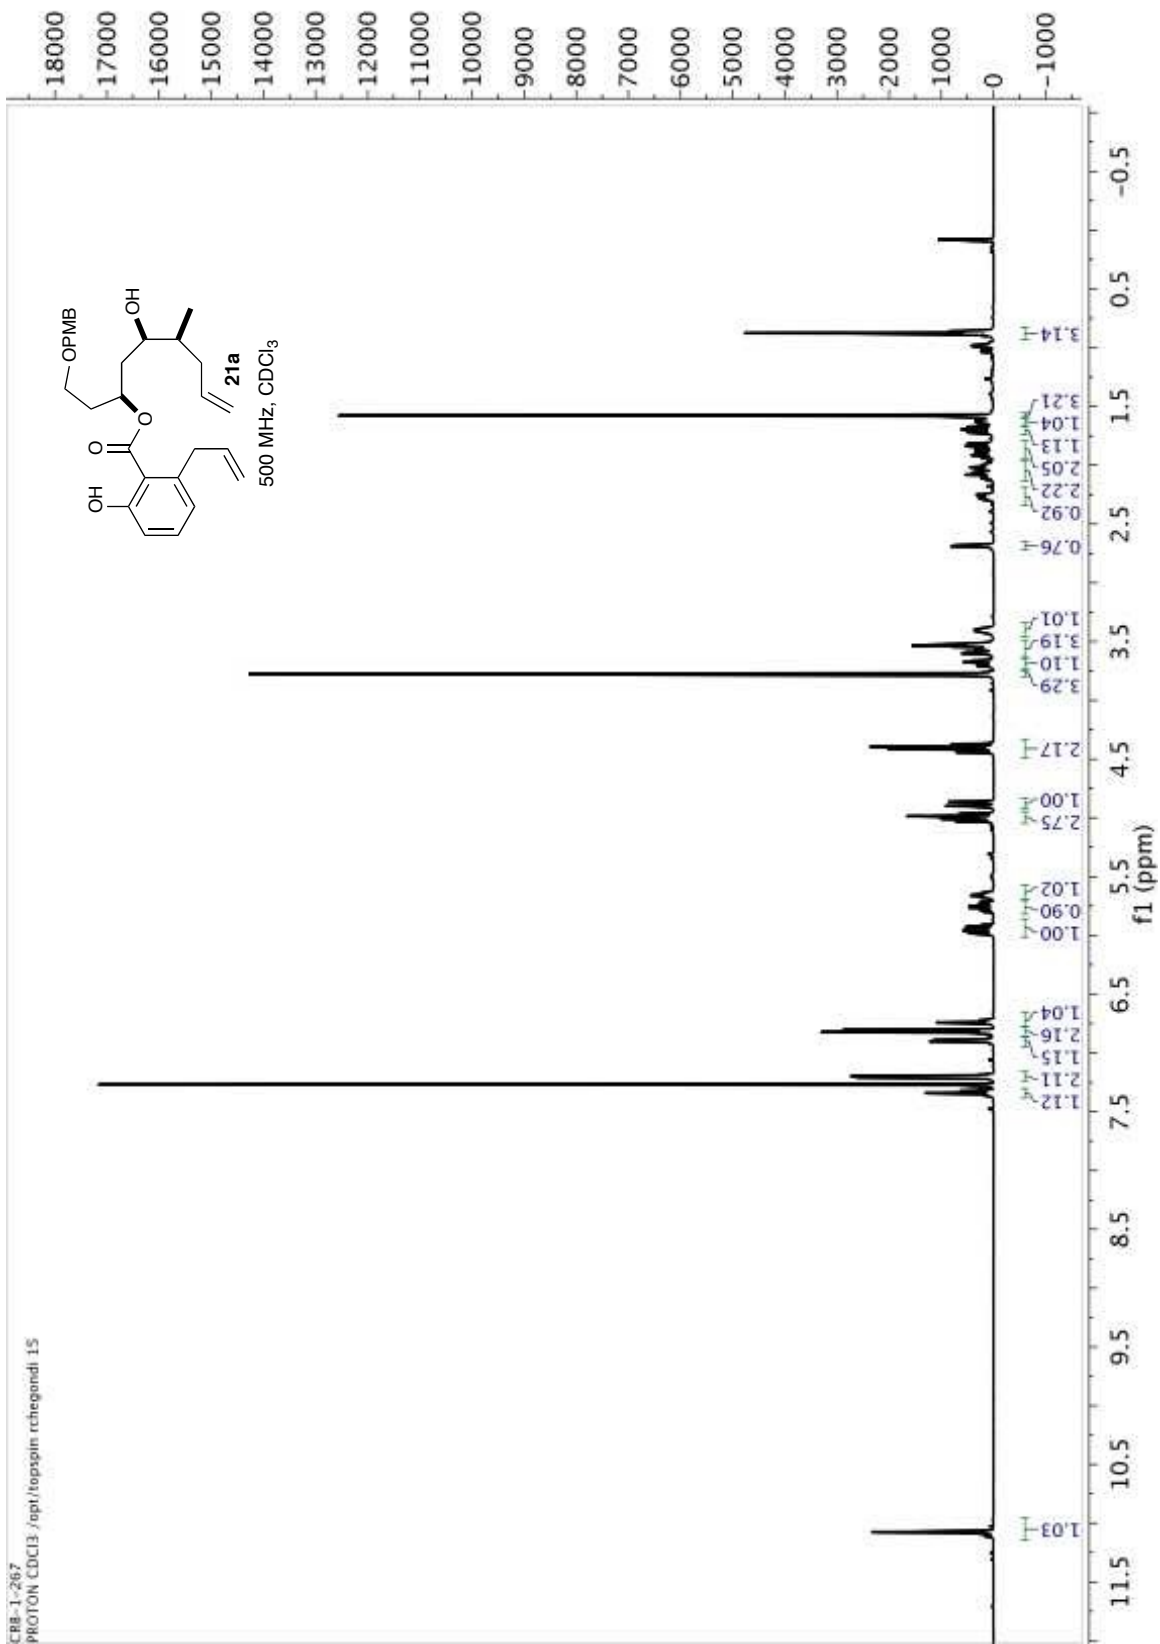

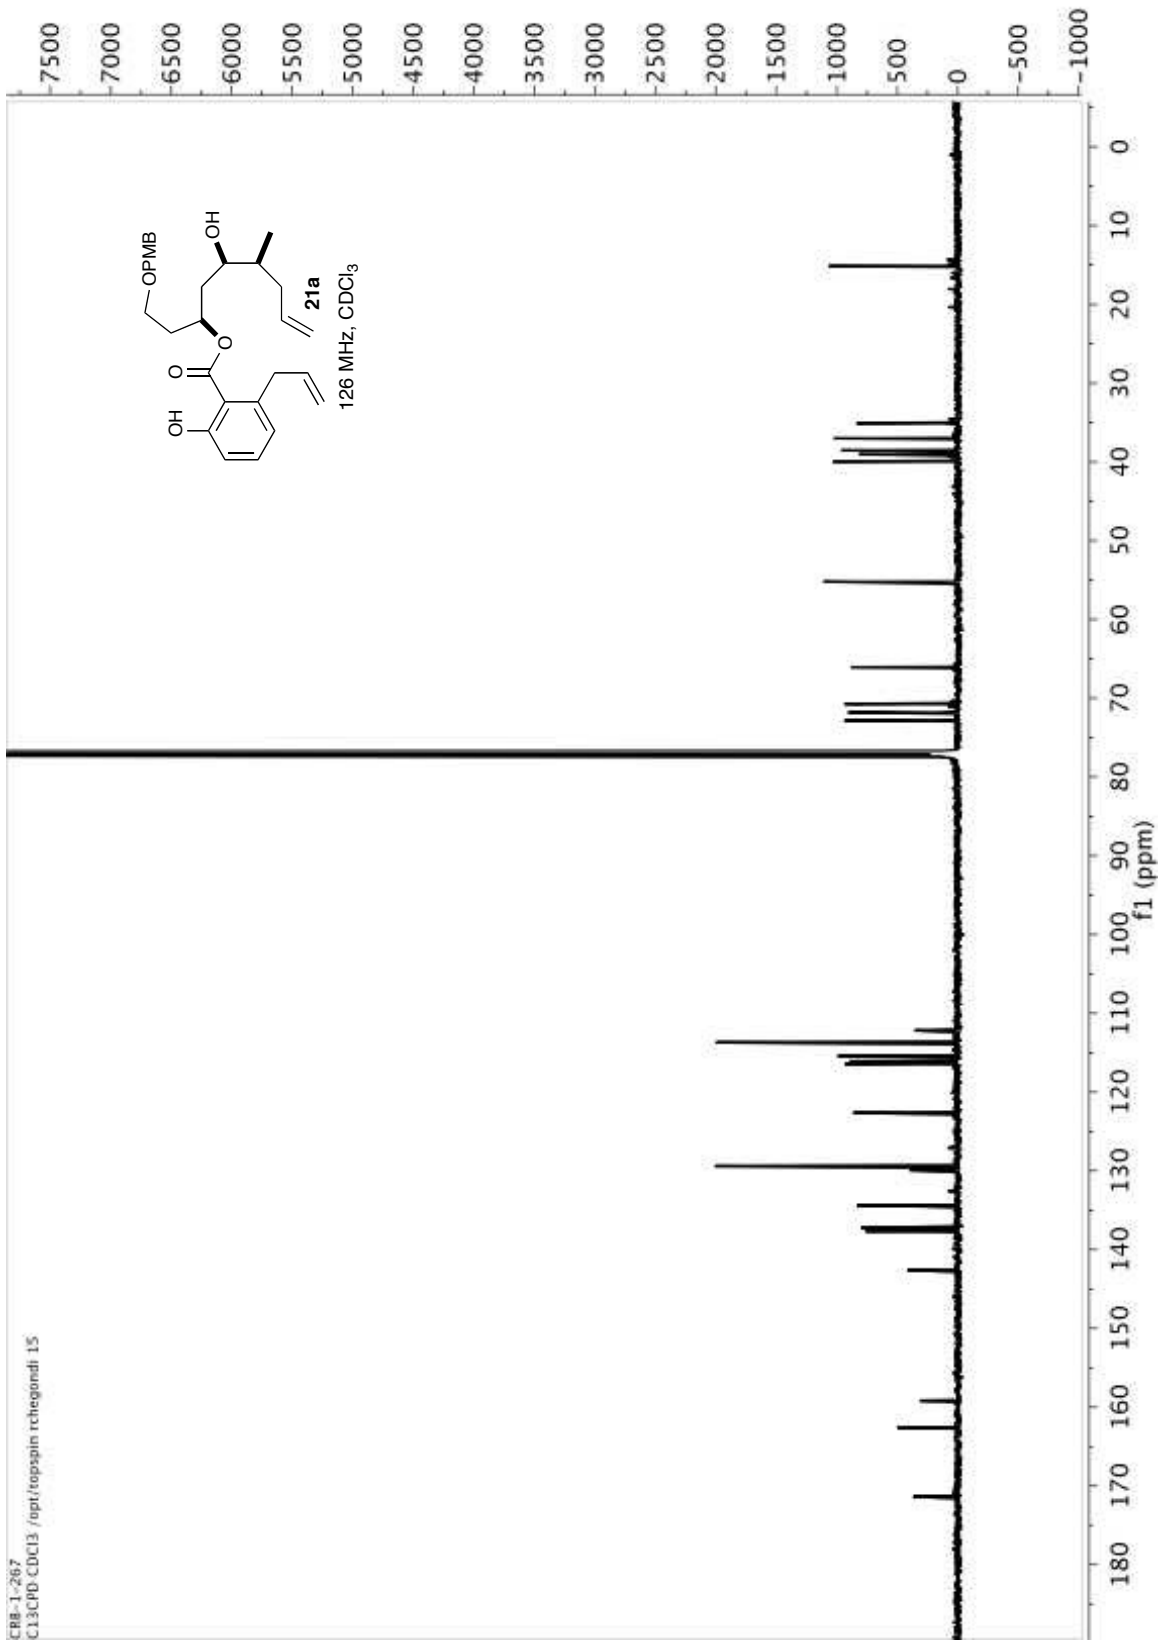



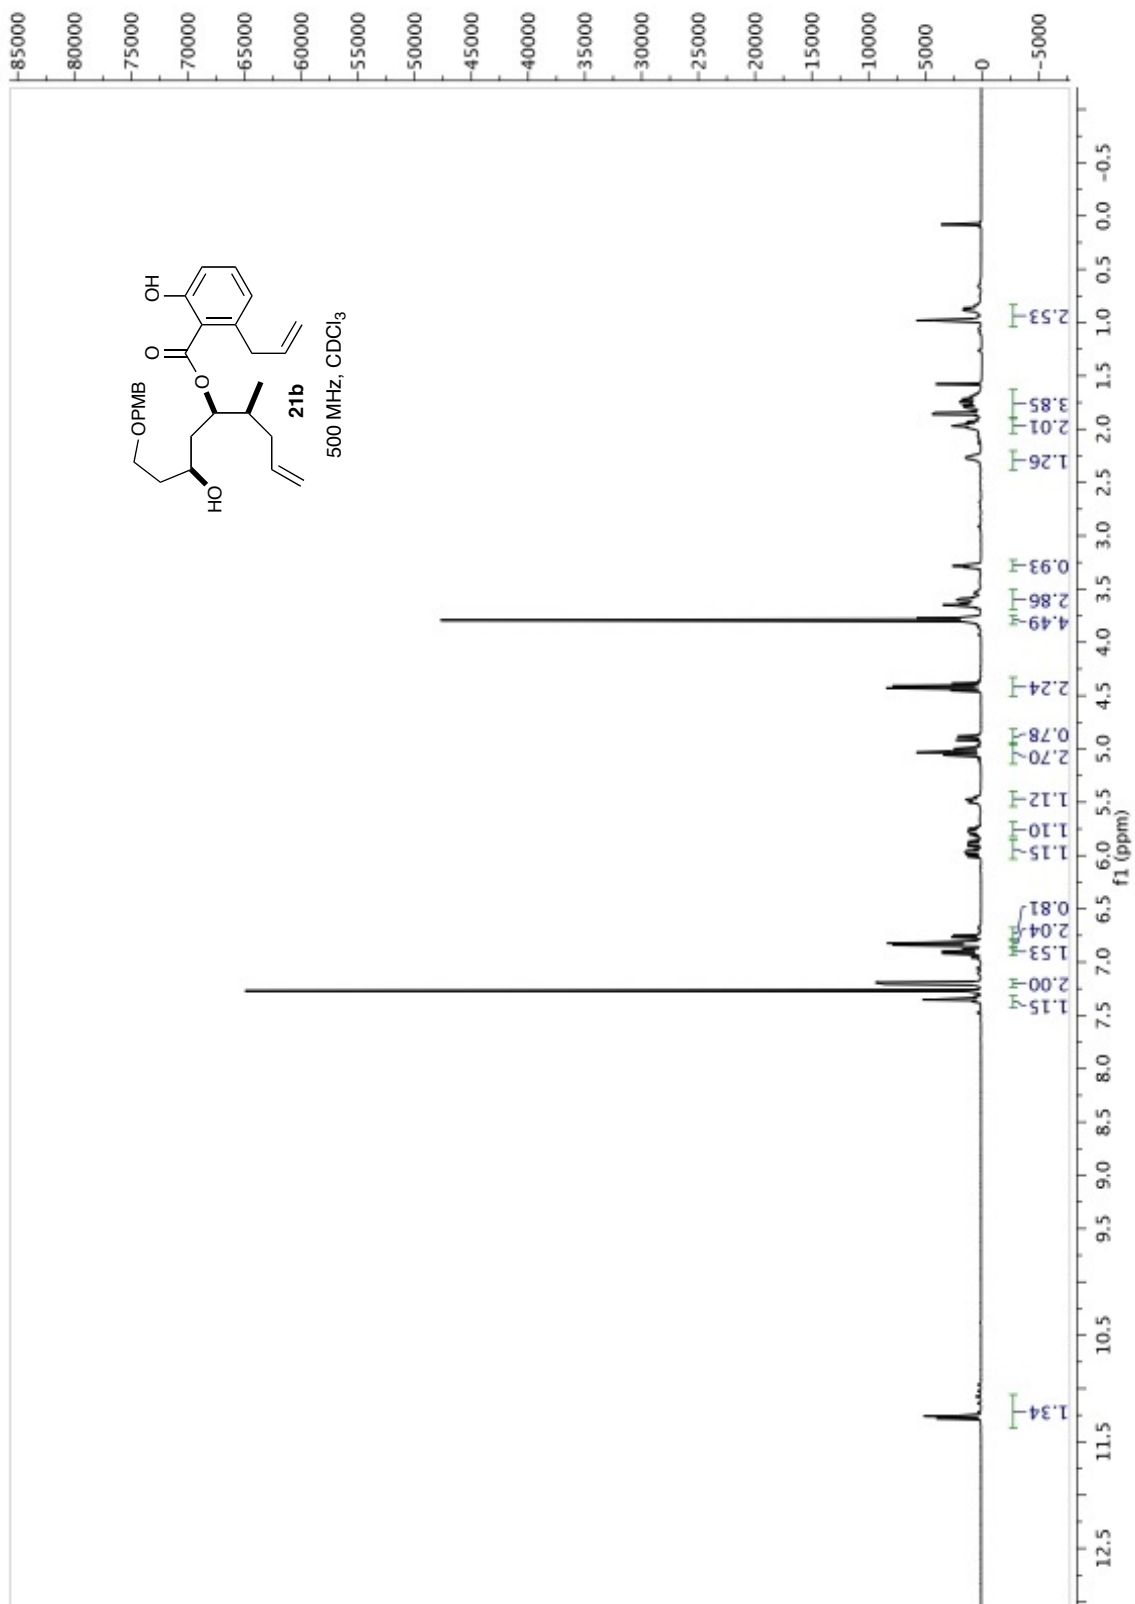

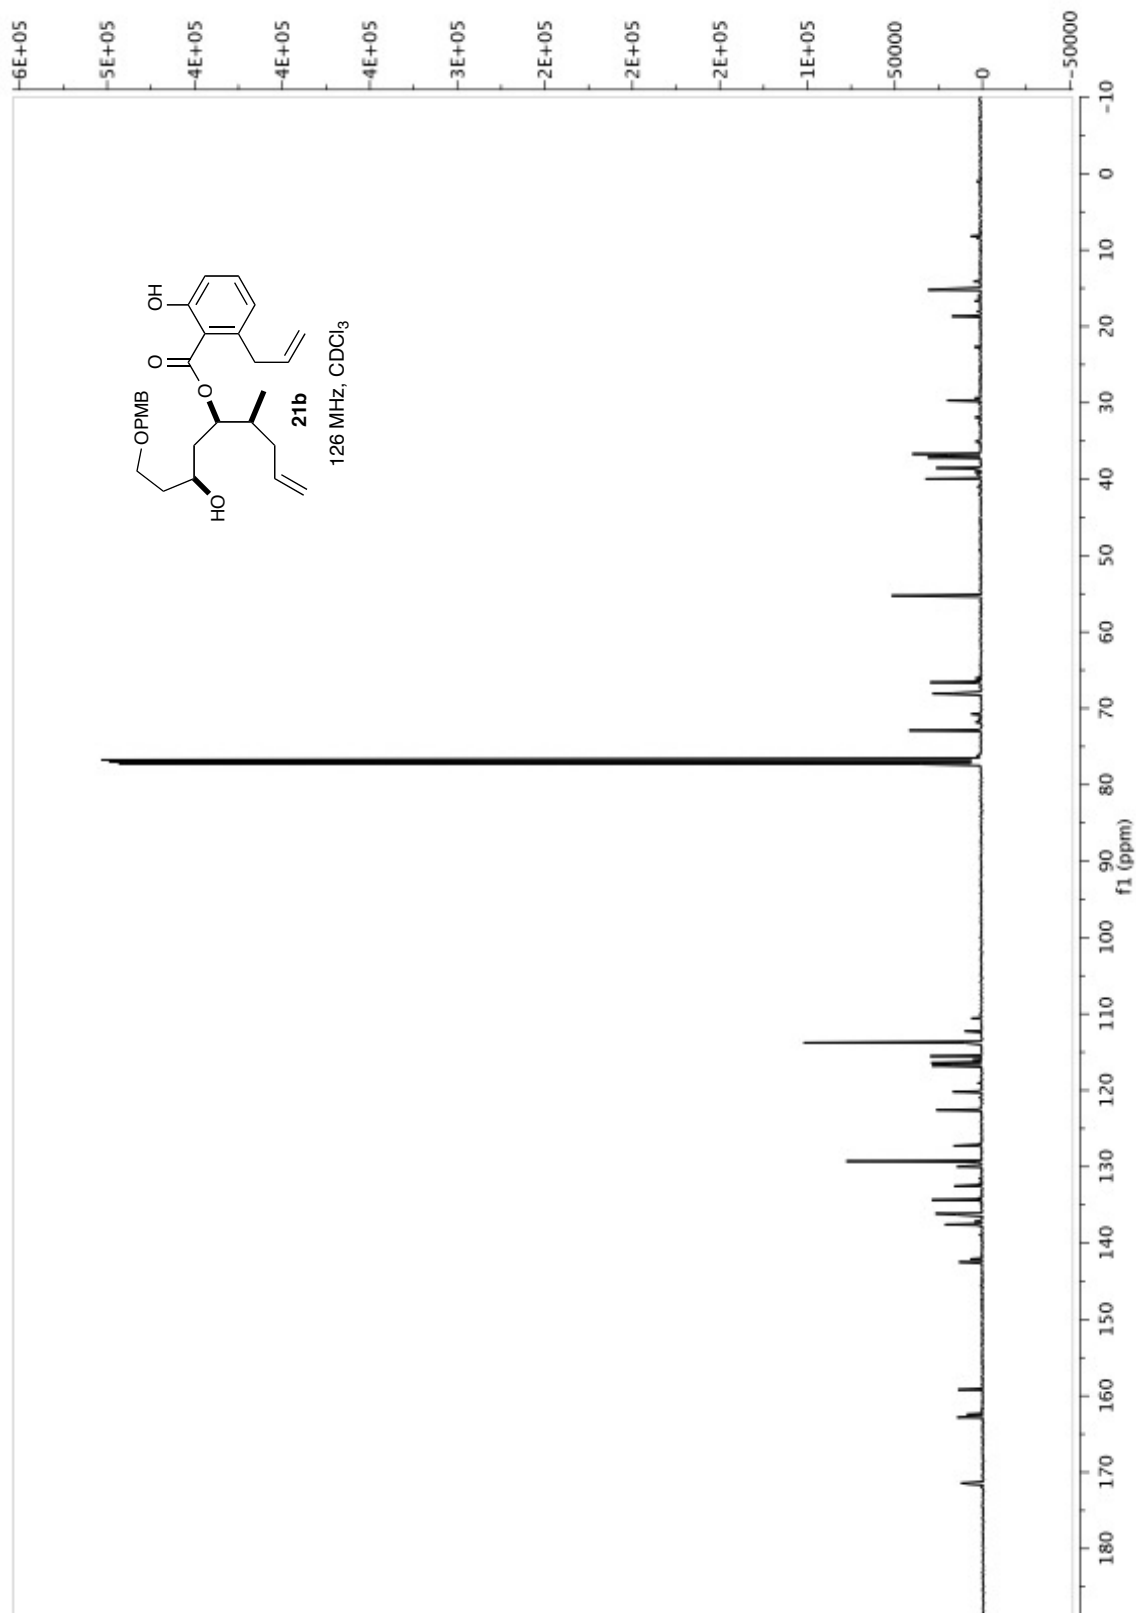

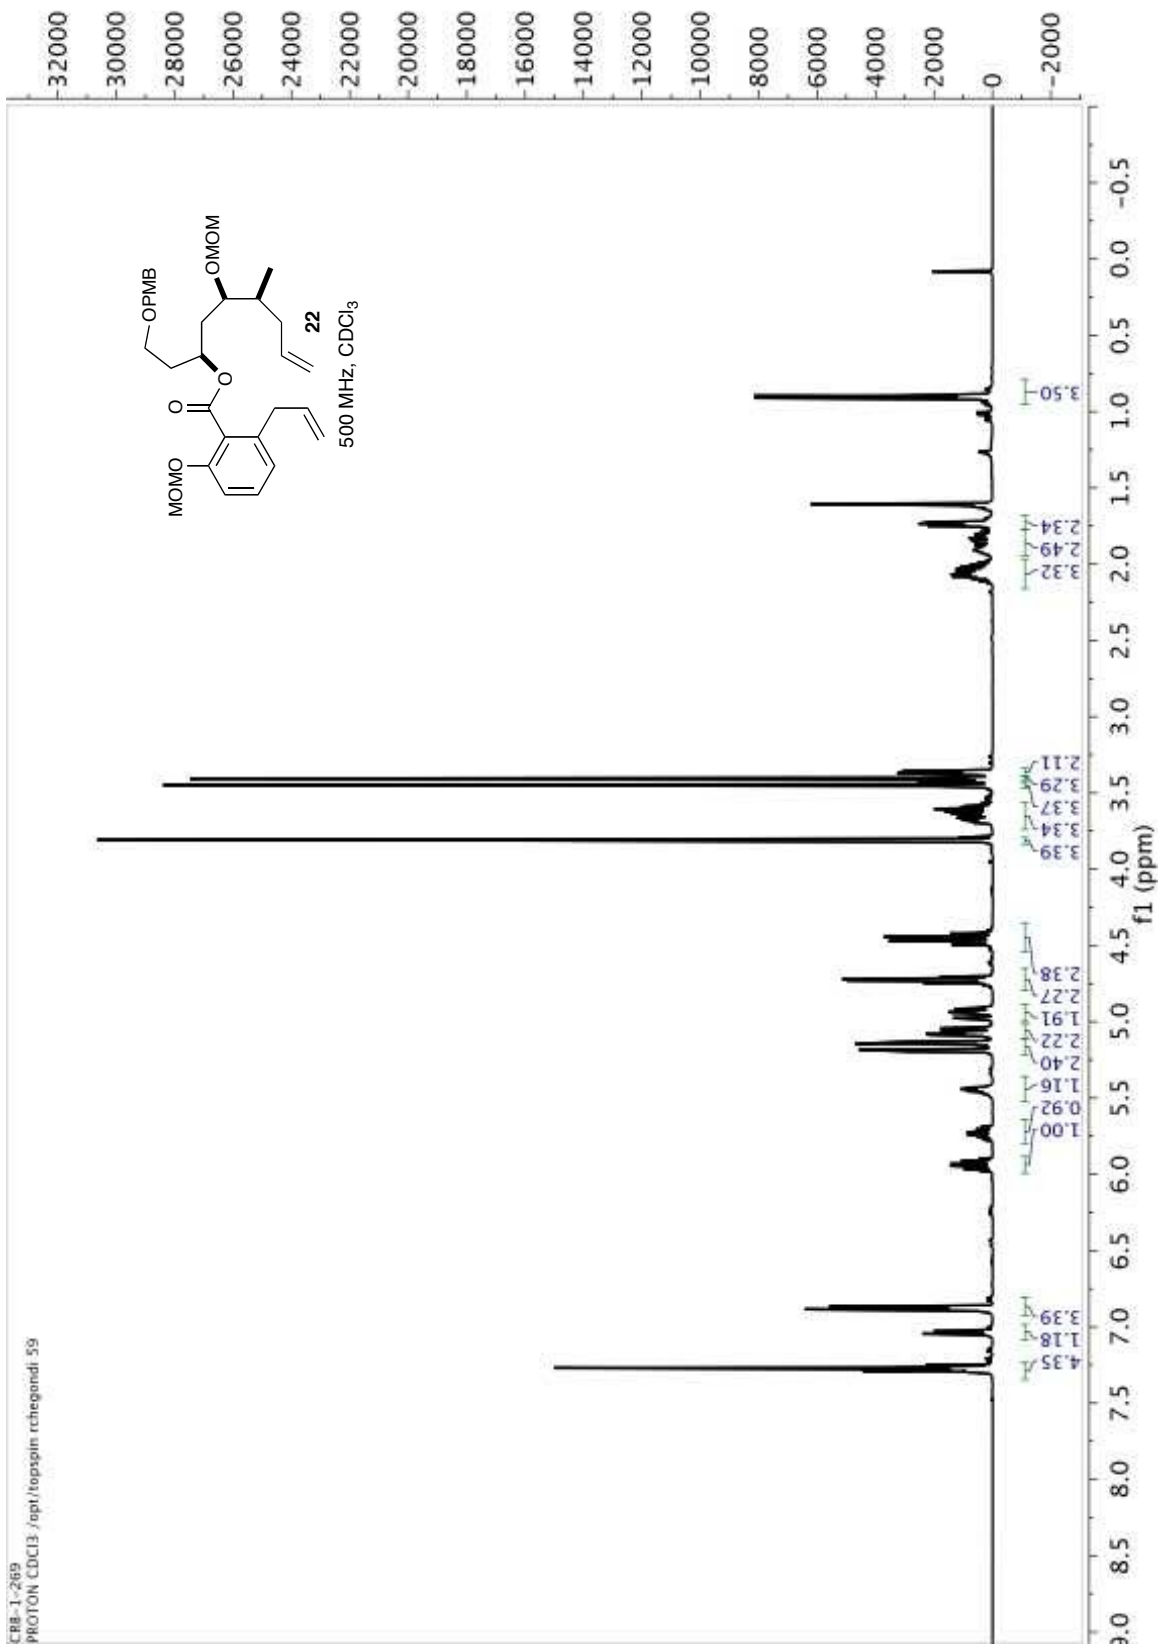

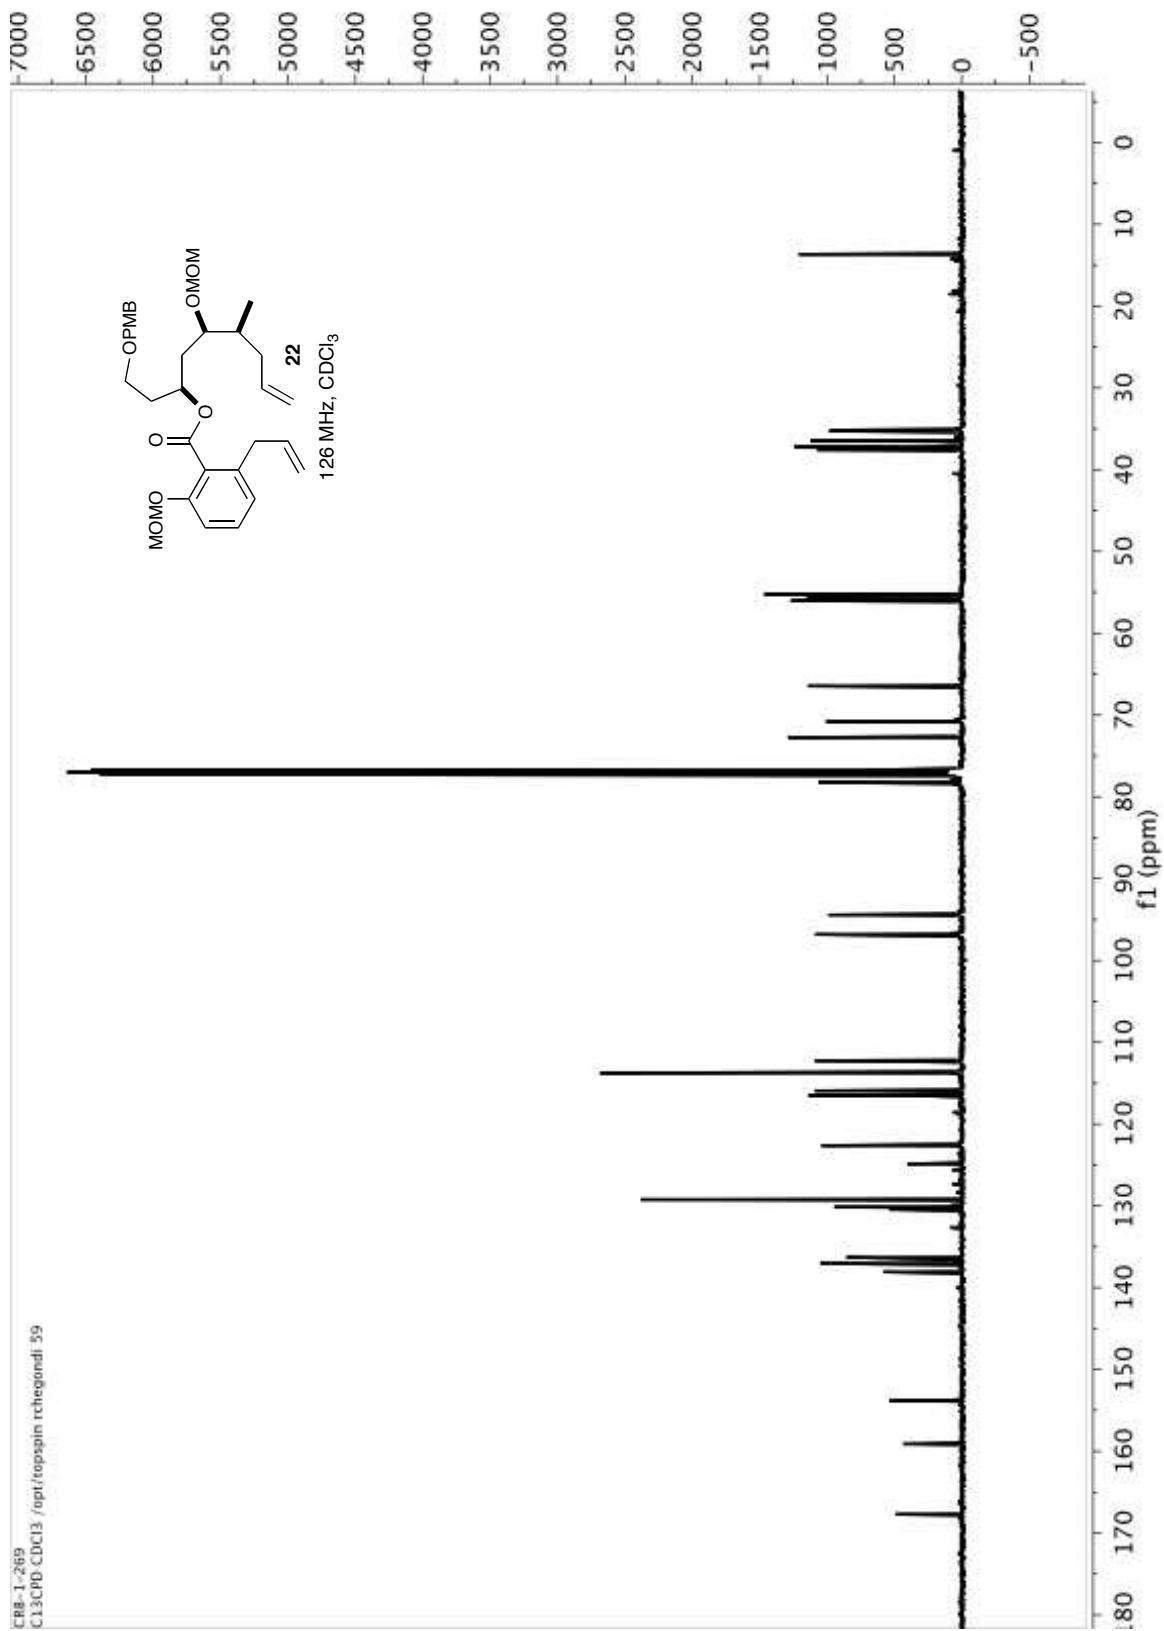

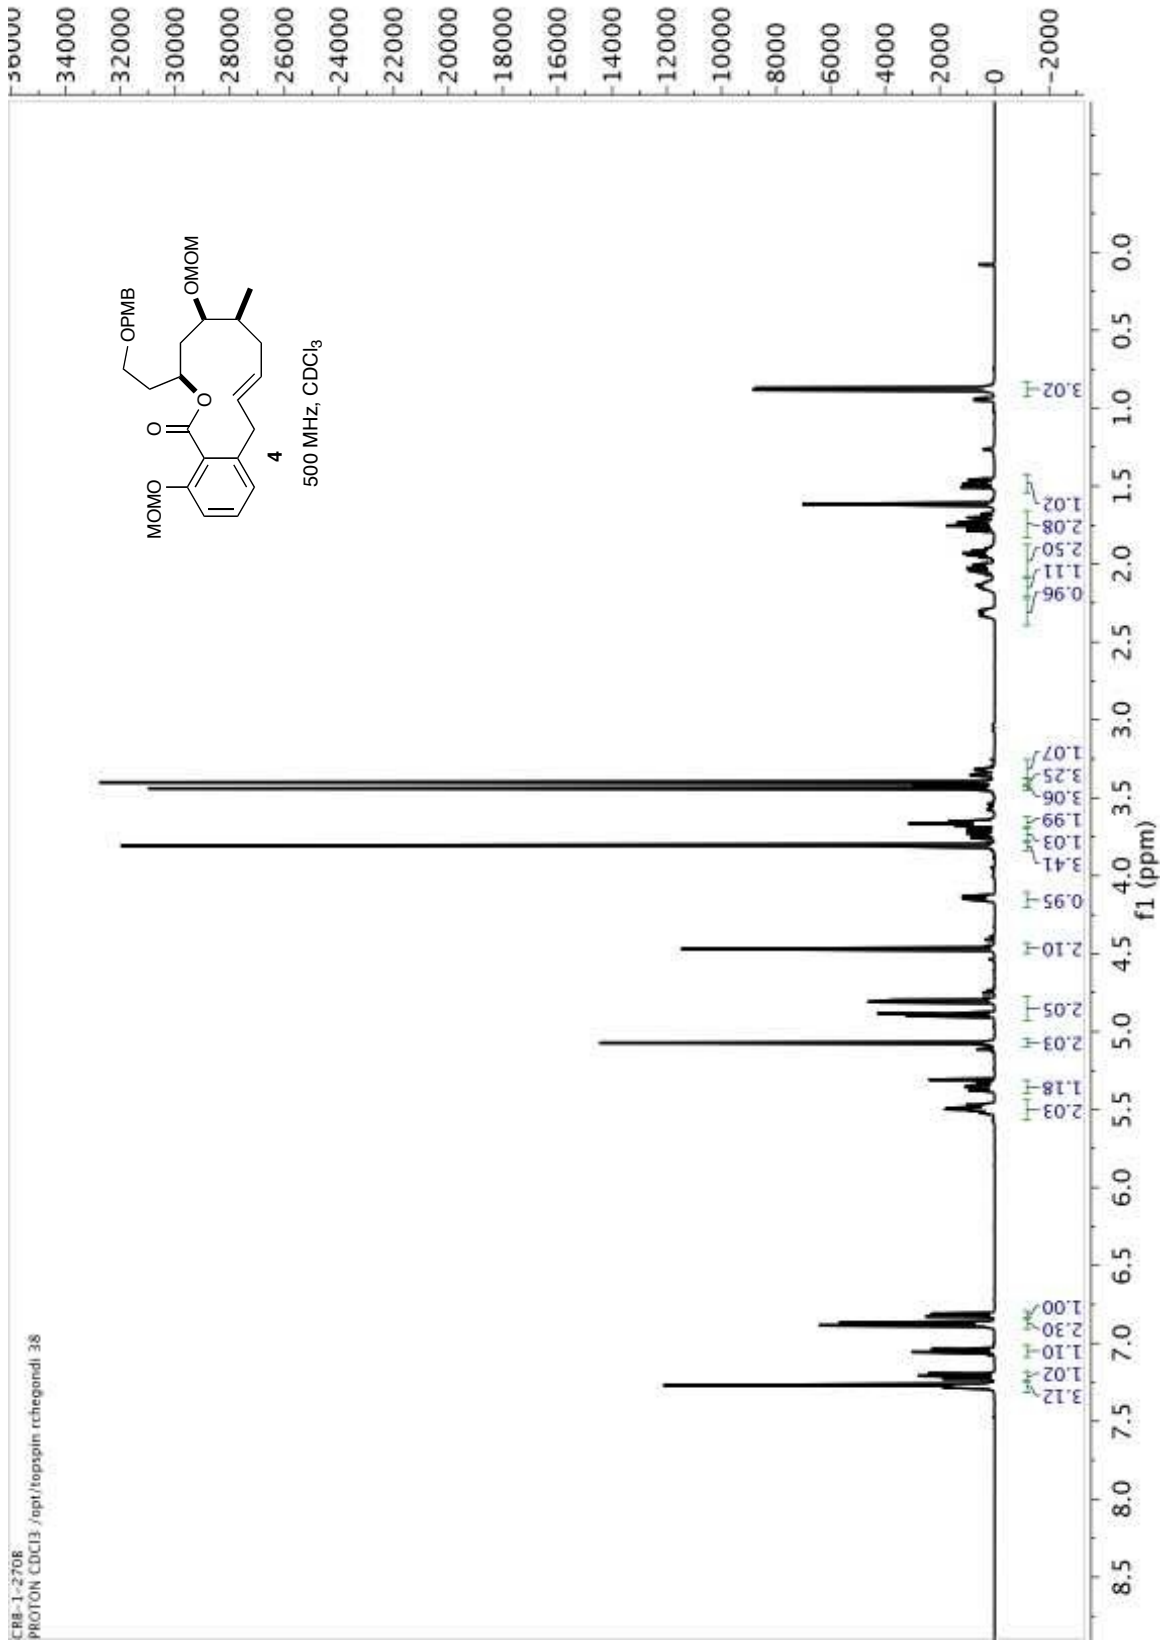

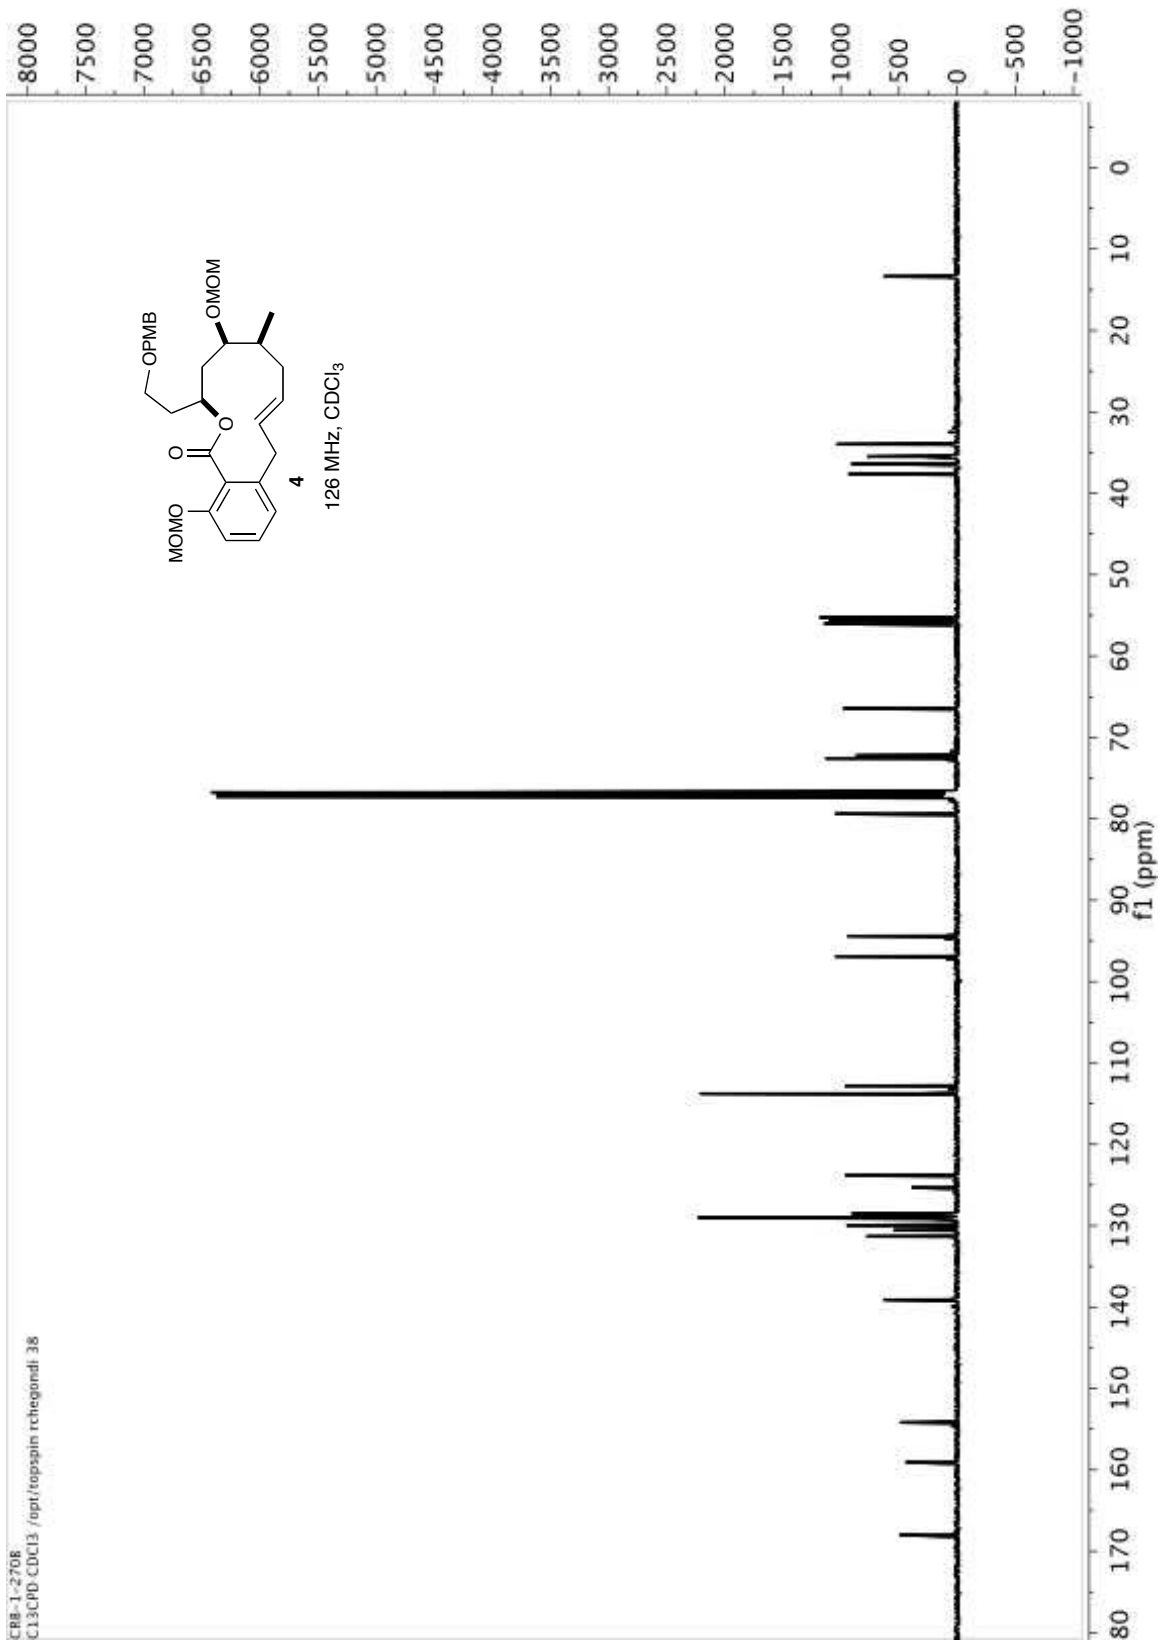

Supplement: NIHMS290428-supplement-1_si_001.pdf [file NIHMS290428-supplement-1_si_001.pdf]
